# Supplementary material for: Argument and Verb Meaning Clustering From Expression Forms in LSE
Source: Front Psychol. 2022 Mar 24;13:806526. doi: 10.3389/fpsyg.2022.806526 (PMC8988939; doi:10.3389/fpsyg.2022.806526)
Supplement: Supplementary Data Sheet 1 — ArgStr_dataset.csv argument microroles and variables analyzed for cluster analysis. [file Data_Sheet_1.CSV]

verb_meaning	anim	indep	orden	R	cl	Idx	ILocus	Clase_morf	Genero	Ref	arg	MRol
Leave	an	0	NA	0	0	0	NA	V.L	Narración	BL-FRE#075	A1	A1.leave
Leave	an	0	NA	0	0	0	NA	V.L	Narración	BL-FRE#102	A1	A1.leave
Leave	an	0	NA	0	0	0	NA	V.L	Narración	HC-JAG#019	A1	A1.leave
Leave	an	0	NA	0	0	0	NA	V.L	Narración	HC-JRV#039	A1	A1.leave
Leave	an	0	NA	0	0	0	NA	V.L	Narración	HC-JRV#050	A1	A1.leave
Leave	an	L	a	0	0	0	NA	V.L	Narración	HC-JRV#051	A1	A1.leave
Leave	an	0	NA	R	cld	0	NA	cle	Narración	HC-JRV#074	A1	A1.leave
Leave	an	0	NA	0	cld	0	NA	cle	Narración	HC-JRV#120	A1	A1.leave
Leave	an	0	NA	0	cld	0	NA	cle	Narración	HC-JRV#210	A1	A1.leave
Leave	an	0	NA	0	cld	0	NA	cle	Narración	HR-AFS#015	A1	A1.leave
Leave	an	0	NA	0	cld	0	NA	cle	Narración	HR-AFS#026	A1	A1.leave
Leave	an	0	NA	0	cld	0	NA	cle	Narración	HR-FRE#012	A1	A1.leave
Leave	an	0	NA	0	cld	0	NA	cle	Narración	HR-FRE#061	A1	A1.leave
Leave	an	0	NA	0	cld	0	NA	cle	Narración	HR-MJC#083	A1	A1.leave
Leave	an	0	NA	0	cld	0	NA	cle	Narración	HR-MJC#104	A1	A1.leave
Leave	an	0	NA	0	cld	0	NA	cle	Narración	HR-MJC#105	A1	A1.leave
Leave	in	0	NA	0	cld	0	NA	cle	Narración	PS-AFS#017	A1	A1.leave
Leave	an	0	NA	0	cld	0	NA	cle	Narración	PS-FRE#028	A1	A1.leave
Leave	an	0	NA	0	cld	0	NA	cle	Narración	PS-FRE#029	A1	A1.leave
Leave	an	0	NA	0	cld	0	NA	cle	Narración	PS-FRE#030	A1	A1.leave
Leave	in	0	NA	0	cld	0	NA	cle	Narración	PS-FRE#058	A1	A1.leave
Leave	in	0	NA	0	cld	0	NA	cle	Narración	PS-FRE#073	A1	A1.leave
Leave	an	L	a	0	cld	0	NA	cle	Narración	PS-FRE#106	A1	A1.leave
Leave	an	0	NA	R	cld	0	NA	cle	Narración	PS-FRE#117	A1	A1.leave
Leave	an	0	NA	0	cld	0	NA	cle	Narración	PS-FRE#123	A1	A1.leave
Leave	an	0	NA	0	cld	0	NA	cle	Narración	PS-FRE#126	A1	A1.leave
Leave	in	0	NA	R	cld	0	NA	cle	Narración	PS-JRV#042	A1	A1.leave
Leave	an	L	a	0	0	0	NA	V.L	Narración	PS-JRV#047	A1	A1.leave
Leave	an	L	a	0	0	0	NA	V.L	Narración	PS-JRV#068	A1	A1.leave
Leave	an	L	a	0	cld	0	NA	cle	Narración	PS-JRV#092	A1	A1.leave
Leave	an	0	NA	0	cld	0	NA	cle	Narración	PS-JRV#093	A1	A1.leave
Leave	an	0	NA	0	cld	0	NA	cle	Narración	PS-JRV#094	A1	A1.leave
Leave	an	0	NA	0	0	0	NA	V.L	Narración	PS-JRV#107	A1	A1.leave
Leave	an	L	a	0	0	0	NA	V.L	Narración	PS-JRV#108	A1	A1.leave
Leave	an	0	NA	0	0	0	NA	V.L	Narración	PS-JRV#125	A1	A1.leave
Leave	an	L	a	0	0	0	NA	V.L	Narración	PS-MJC#089	A1	A1.leave
Leave	an	0	NA	0	cld	0	NA	cle	Narración	PS-MJC#107	A1	A1.leave
Leave	an	0	NA	0	cld	0	NA	cle	Narración	PS-MJC#109	A1	A1.leave
Leave	an	0	NA	0	cld	0	NA	cle	Narración	PS-MJC#134	A1	A1.leave
Leave	an	L	a	0	cld	0	NA	V.L	Ejemplos elicitados	VV-ARS#068	A1	A1.leave
Throw	an	L	a	R	0	0	NA	V.L	Narración	BL-FRE#120	A1	A1.throw
Throw	an	0	NA	R	0	0	NA	V.L	Narración	BL-FRE#121	A1	A1.throw
Throw	an	0	NA	R	0	0	NA	V.L	Narración	BL-FRE#132	A1	A1.throw
Throw	an	0	NA	R	0	0	NA	clm	Narración	PS-AFS#008	A1	A1.throw
Throw	an	0	NA	R	0	0	NA	clm	Narración	PS-AFS#009	A1	A1.throw
Throw	an	0	NA	R	0	0	NA	V.L	Narración	PS-AFS#034	A1	A1.throw
Throw	an	0	NA	0	0	0	NA	V.L	Narración	PS-MJC#008	A1	A1.throw
Throw	an	0	NA	R	0	0	NA	V.L	Narración	PS-MJC#031	A1	A1.throw
Throw	an	0	NA	R	0	0	NA	V.L	Narración	PS-MJC#103	A1	A1.throw
Throw	an	L	a	0	0	I1	n	V.L	Ejemplos elicitados	VV-ARS#046	A1	A1.throw
Throw	an	L	a	0	0	I1	n	V.L	Ejemplos elicitados	VV-ARS#090	A1	A1.throw
Throw	an	L	a	0	0	0	NA	V.L	Ejemplos elicitados	VV-FRE#046	A1	A1.throw
Throw	an	L	a	0	0	0	NA	V.L	Ejemplos elicitados	VV-FRE#090	A1	A1.throw
Throw	an	L	a	0	0	I1	n	V.L	Ejemplos elicitados	VV-JRV#049	A1	A1.throw
Throw	an	L	a	0	0	0	NA	V.L	Ejemplos elicitados	VV-JRV#096	A1	A1.throw
Help	an	0	NA	0	0	I1	n	V.Dir	Narración	BL-FRE#084	A1	A1.help
Help	an	0	NA	R	0	I1	s	V.Dir	Narración	BL-FRE#161	A1	A1.help
Help	an	0	NA	R	0	I1	s	V.Dir	Narración	BL-FRE#165	A1	A1.help
Help	an	L	a	0	0	I1	s	V.Dir	Narración	HR-CBB#043	A1	A1.help
Help	an	0	NA	0	0	I1	s	V.Dir	Narración	PS-AFS#032	A1	A1.help
Help	an	0	NA	R	0	I1	s	V.Dir	Narración	PS-FRE#086	A1	A1.help
Help	an	0	NA	0	0	I1	s	V.Dir	Narración	PS-JRV#081	A1	A1.help
Help	an	0	NA	0	0	I1	s	V.Dir	Narración	PS-JRV#083	A1	A1.help
Help	an	0	NA	R	0	I1	s	V.Dir	Narración	PS-MJC#092	A1	A1.help
Help	an	L	a	0	0	I1	n	V.Dir	Narración	PS-MJC#102	A1	A1.help
Help	an	L	a	0	0	I1	n	V.Dir	Ejemplos elicitados	VV-ARS#030	A1	A1.help
Help	an	L	a	0	0	I1	s	V.Dir	Ejemplos elicitados	VV-ARS#060	A1	A1.help
Help	an	L	a	0	0	I1	s	V.Dir	Ejemplos elicitados	VV-ARS#073	A1	A1.help
Help	an	L	a	0	0	I1	n	V.Dir	Ejemplos elicitados	VV-FRE#030	A1	A1.help
Help	an	L	a	0	0	I1	s	V.Dir	Ejemplos elicitados	VV-FRE#057	A1	A1.help
Help	an	L	a	0	0	I1	s	V.Dir	Ejemplos elicitados	VV-FRE#060	A1	A1.help
Help	an	L	a	0	0	I1	s	V.Dir	Ejemplos elicitados	VV-FRE#073	A1	A1.help
Help	an	L	a	0	0	I1	n	V.Dir	Ejemplos elicitados	VV-JRV#033	A1	A1.help
Help	an	L	a	0	0	I1	s	V.Dir	Ejemplos elicitados	VV-JRV#066	A1	A1.help
Help	an	0	NA	0	0	I1	s	V.Dir	Drama	WS-BIE#108	A1	A1.help
Search	an	0	NA	0	0	0	NA	V.P	Narración	BL-FRE#129	A1	A1.search
Search	an	L	a	R	0	0	NA	V.P	Narración	BL-FRE#178	A1	A1.search
Search	an	0	NA	0	0	0	NA	V.P	Narración	BL-FRE#181	A1	A1.search
Search	an	0	NA	R	0	0	NA	V.P	Narración	BL-FRE#187	A1	A1.search
Search	an	L	a	0	0	0	NA	V.P	Entrevista	ET-NXG#104 ET-NXG#105	A1	A1.search
Search	an	L	a	0	0	0	NA	V.P	Narración	HR-AFS#039	A1	A1.search
Search	an	L	a	0	0	0	NA	V.P	Narración	HR-ARS#010	A1	A1.search
Search	an	0	NA	0	0	0	NA	V.P	Narración	HR-ARS#012	A1	A1.search
Search	an	0	NA	0	0	0	NA	V.P	Narración	HR-ARS#021	A1	A1.search
Search	an	0	NA	0	0	0	NA	V.P	Narración	HR-ARS#026	A1	A1.search
Search	an	0	NA	R	0	0	NA	V.P	Narración	HR-ARS#027	A1	A1.search
Search	an	0	NA	0	0	0	NA	V.P	Narración	HR-ARS#030	A1	A1.search
Search	an	0	NA	0	0	0	NA	V.P	Narración	HR-ARS#039	A1	A1.search
Search	an	0	NA	0	0	0	NA	V.P	Narración	HR-CBB#029	A1	A1.search
Search	an	0	NA	R	0	0	NA	V.P	Narración	HR-CBB#034	A1	A1.search
Search	an	0	NA	0	0	0	NA	V.P	Narración	HR-CBB#040	A1	A1.search
Search	an	0	NA	R	0	0	NA	V.P	Narración	HR-FRE#021	A1	A1.search
Search	an	0	NA	R	0	0	NA	V.P	Narración	HR-FRE#022	A1	A1.search
Search	an	0	NA	R	0	0	NA	V.P	Narración	HR-FRE#023	A1	A1.search
Search	an	0	NA	R	0	0	NA	V.P	Narración	HR-FRE#024	A1	A1.search
Search	an	L	a	R	0	0	NA	V.P	Narración	HR-FRE#029	A1	A1.search
Search	an	L	a	0	0	0	NA	V.P	Narración	HR-MJC#031	A1	A1.search
Search	an	0	NA	R	0	0	NA	V.P	Narración	HR-MJC#032	A1	A1.search
Search	an	0	NA	0	0	0	NA	V.P	Narración	HR-MJC#034	A1	A1.search
Search	an	L	a	0	0	0	NA	V.P	Narración	HR-MJC#042	A1	A1.search
Search	an	0	NA	0	0	0	NA	V.P	Narración	HR-MJC#044	A1	A1.search
Search	an	0	NA	0	0	0	NA	V.P	Narración	HR-MJC#048	A1	A1.search
Search	an	0	NA	0	0	0	NA	V.P	Narración	HR-MJC#064	A1	A1.search
Search	an	L	a	0	0	0	NA	V.P	Narración	HR-MJC#065	A1	A1.search
Search	an	0	NA	R	0	0	NA	V.P	Narración	HR-MJC#090	A1	A1.search
Search	an	L	a	0	0	0	NA	V.P	Narración	VS-CBB#046	A1	A1.search
Search	an	L	a	0	0	0	NA	V.P	Ejemplos elicitados	VV-ARS#003	A1	A1.search
Search	an	L	a	0	0	I1	n	V.P	Ejemplos elicitados	VV-ARS#035	A1	A1.search
Search	an	0	NA	0	0	I1	n	V.P	Ejemplos elicitados	VV-FRE#003	A1	A1.search
Search	an	L	a	0	0	0	NA	V.P	Ejemplos elicitados	VV-FRE#035	A1	A1.search
Search	an	L	a	0	0	0	NA	V.P	Ejemplos elicitados	VV-FRE#048	A1	A1.search
Search	an	L	a	0	0	0	NA	V.P	Ejemplos elicitados	VV-JRV#003	A1	A1.search
Search	an	L	a	0	0	0	NA	V.P	Ejemplos elicitados	VV-JRV#038	A1	A1.search
Search	an	0	NA	0	0	0	NA	V.P	Drama	WS-BIE#092	A1	A1.search
Take	an	L	a	R	0	0	NA	clm	Narración	HR-AFS#053	A1	A1.take
Take	an	0	NA	R	0	0	NA	clm	Narración	HR-AFS#055	A1	A1.take
Take	an	0	NA	R	0	0	NA	clm	Narración	HR-MJC#112	A1	A1.take
Take	an	0	NA	R	0	0	NA	clm	Narración	HR-MJC#117	A1	A1.take
Take	an	0	NA	R	0	0	NA	clm	Narración	PS-FRE#081	A1	A1.take
Take	an	0	NA	R	0	0	NA	clm	Narración	PS-FRE#082	A1	A1.take
Take	an	0	NA	R	0	0	NA	clm	Narración	PS-FRE#083	A1	A1.take
Take	an	0	NA	R	0	0	NA	clm	Narración	PS-FRE#100	A1	A1.take
Take	an	0	NA	R	0	0	NA	clm	Narración	PS-FRE#102	A1	A1.take
Take	an	0	NA	R	0	0	NA	clm	Narración	PS-FRE#116	A1	A1.take
Take	an	0	NA	R	0	0	NA	clm	Narración	PS-FRE#120	A1	A1.take
Take	an	0	NA	R	0	0	NA	clm	Narración	PS-FRE#121	A1	A1.take
Take	an	0	NA	R	0	0	NA	clm	Narración	PS-FRE#122	A1	A1.take
Take	an	L	a	0	0	0	NA	clm	Narración	PS-JRV#026	A1	A1.take
Take	an	0	NA	R	0	0	NA	clm	Narración	PS-JRV#040	A1	A1.take
Take	an	0	NA	R	0	0	NA	clm	Narración	PS-JRV#048	A1	A1.take
Take	an	0	NA	R	0	0	NA	clm	Narración	PS-JRV#050	A1	A1.take
Take	an	0	NA	R	0	0	NA	clm	Narración	PS-JRV#054	A1	A1.take
Take	an	L	a	R	0	0	NA	clm	Narración	PS-JRV#060	A1	A1.take
Take	an	0	NA	R	0	0	NA	clm	Narración	PS-JRV#063	A1	A1.take
Take	an	0	NA	R	0	0	NA	clm	Narración	PS-JRV#102	A1	A1.take
Take	an	0	NA	R	0	I1	s	clm	Narración	PS-JRV#105	A1	A1.take
Take	an	0	NA	R	0	0	NA	clm	Narración	PS-JRV#113	A1	A1.take
Take	an	0	NA	R	0	0	NA	clm	Narración	PS-MJC#015	A1	A1.take
Take	an	0	NA	R	0	0	NA	clm	Narración	PS-MJC#029	A1	A1.take
Take	an	0	NA	R	0	0	NA	clm	Narración	PS-MJC#030	A1	A1.take
Take	an	0	NA	R	0	0	NA	clm	Narración	PS-MJC#054	A1	A1.take
Take	an	0	NA	R	0	0	NA	clm	Narración	PS-MJC#078	A1	A1.take
Take	an	0	NA	R	0	0	NA	clm	Narración	PS-MJC#133	A1	A1.take
Take	an	L	a	R	0	I1	n	clm	Ejemplos elicitados	VV-ARS#057	A1	A1.take
Take	an	L	a	R	0	I1	n	clm	Ejemplos elicitados	VV-FRE#078	A1	A1.take
Take	an	0	NA	R	0	0	NA	clm	Narración	BL-FRE#024	A1	A1.take
Take	an	L	a	R	0	0	NA	V.P	Narración	BL-FRE#071	A1	A1.take
Take	an	L	a	R	0	0	NA	clm	Narración	BL-FRE#096	A1	A1.take
Take	an	L	a	R	0	0	NA	clm	Narración	BL-FRE#099	A1	A1.take
Take	an	0	NA	R	0	0	NA	clm	Narración	BL-FRE#108	A1	A1.take
Take	an	0	NA	R	0	0	NA	clm	Narración	BL-FRE#109	A1	A1.take
Take	an	0	NA	0	0	0	NA	V.P	Narración	BL-FRE#124	A1	A1.take
Take	an	0	NA	0	0	0	NA	V.P	Narración	HC-JMR#016	A1	A1.take
Take	an	L	a	R	0	0	NA	clm	Narración	HR-AFS#043	A1	A1.take
Take	an	L	a	R	0	I1	n	V.P	Narración	HR-ARS#017	A1	A1.take
Take	an	0	NA	R	0	0	NA	clm	Narración	HR-FRE#031	A1	A1.take
Take	an	0	NA	0	0	0	NA	clm	Narración	HR-FRE#046	A1	A1.take
Take	an	0	NA	R	0	0	NA	clm	Narración	HR-MJC#059	A1	A1.take
Take	an	0	NA	R	0	0	NA	clm	Narración	HR-MJC#155	A1	A1.take
Take	an	0	NA	R	0	0	NA	V.P	Narración	PS-AFS#007	A1	A1.take
Take	an	0	NA	0	0	0	NA	V.P	Narración	PS-AFS#033	A1	A1.take
Take	an	0	NA	R	0	0	NA	clm	Narración	PS-FRE#003	A1	A1.take
Take	an	0	NA	R	0	0	NA	clm	Narración	PS-FRE#004	A1	A1.take
Take	an	0	NA	R	0	0	NA	clm	Narración	PS-FRE#008	A1	A1.take
Take	an	0	NA	R	0	0	NA	V.P	Narración	PS-FRE#032	A1	A1.take
Take	an	0	NA	R	0	0	NA	V.P	Narración	PS-FRE#033	A1	A1.take
Take	an	0	NA	R	0	0	NA	V.P	Narración	PS-FRE#035	A1	A1.take
Take	an	0	NA	R	0	0	NA	V.P	Narración	PS-FRE#036	A1	A1.take
Take	an	0	NA	R	0	0	NA	V.P	Narración	PS-FRE#048	A1	A1.take
Take	an	0	NA	R	0	0	NA	V.P	Narración	PS-FRE#057	A1	A1.take
Take	an	0	NA	R	0	I2	s	clm	Narración	PS-FRE#112	A1	A1.take
Take	an	0	NA	R	0	I1	s	clm	Narración	PS-FRE#114	A1	A1.take
Take	an	0	NA	R	0	0	NA	clm	Narración	PS-JRV#007	A1	A1.take
Take	an	0	NA	R	0	0	NA	clm	Narración	PS-JRV#009	A1	A1.take
Take	an	0	NA	R	0	0	NA	clm	Narración	PS-JRV#011	A1	A1.take
Take	an	0	NA	R	0	0	NA	clm	Narración	PS-JRV#013	A1	A1.take
Take	an	0	NA	R	0	0	NA	clm	Narración	PS-JRV#018	A1	A1.take
Take	an	0	NA	R	0	0	NA	V.P	Narración	PS-JRV#020	A1	A1.take
Take	an	0	NA	R	0	0	NA	clm	Narración	PS-JRV#025	A1	A1.take
Take	an	0	NA	R	0	0	NA	clm	Narración	PS-JRV#027	A1	A1.take
Take	an	0	NA	R	0	0	NA	clm	Narración	PS-JRV#044	A1	A1.take
Take	an	0	NA	R	0	0	NA	clm	Narración	PS-MJC#014	A1	A1.take
Take	an	0	NA	R	0	0	NA	clm	Narración	PS-MJC#022	A1	A1.take
Take	an	0	NA	R	0	0	NA	clm	Narración	PS-MJC#026	A1	A1.take
Take	an	0	NA	R	0	0	NA	clm	Narración	PS-MJC#028	A1	A1.take
Take	an	0	NA	R	0	0	NA	clm	Narración	PS-MJC#033	A1	A1.take
Take	an	0	NA	R	0	0	NA	clm	Narración	PS-MJC#039	A1	A1.take
Take	an	0	NA	R	0	0	NA	clm	Narración	PS-MJC#040	A1	A1.take
Take	an	0	NA	R	0	0	NA	clm	Narración	PS-MJC#053	A1	A1.take
Take	an	0	NA	R	0	0	NA	clm	Narración	PS-MJC#058	A1	A1.take
Take	an	0	NA	R	0	0	NA	clm	Narración	PS-MJC#125	A1	A1.take
Take	an	0	NA	R	0	0	NA	clm	Narración	PS-MJC#127	A1	A1.take
Take	an	0	NA	0	0	0	NA	V.P	Narración	VS-CBB#012	A1	A1.take
Take	an	L	a	0	0	I2	n	V.P	Ejemplos elicitados	VV-ARS#050	A1	A1.take
Take	an	L	a	0	0	I1	n	clm	Ejemplos elicitados	VV-ARS#075	A1	A1.take
Take	an	L	a	0	0	I2	n	V.P	Ejemplos elicitados	VV-FRE#050	A1	A1.take
Take	an	L	a	0	0	I2	s	clm	Ejemplos elicitados	VV-FRE#075	A1	A1.take
Take	an	L	a	0	0	0	NA	clm	Ejemplos elicitados	VV-FRE#089	A1	A1.take
Take	an	L	a	0	0	0	NA	clm	Ejemplos elicitados	VV-JRV#011	A1	A1.take
Take	an	L	a	0	0	0	NA	clm	Ejemplos elicitados	VV-JRV#014	A1	A1.take
Take	an	L	a	0	0	0	NA	clm	Ejemplos elicitados	VV-JRV#054	A1	A1.take
Take	an	L	a	0	0	0	NA	clm	Ejemplos elicitados	VV-JRV#055	A1	A1.take
Take	an	L	a	0	0	0	NA	V.P	Ejemplos elicitados	VV-JRV#056	A1	A1.take
Take	an	0	NA	0	0	0	NA	V.P	Drama	WS-BIE#021	A1	A1.take
Take	an	0	NA	0	0	0	NA	clm	Drama	WS-BIE#022	A1	A1.take
Take	an	0	NA	0	0	0	NA	V.P	Drama	WS-BIE#095	A1	A1.take
Give	an	0	NA	0	0	I1	s	V.Dir	Narración	BL-FRE#007	A1	A1.give
Give	an	0	NA	0	0	0	NA	V.Dir	Narración	BL-FRE#030	A1	A1.give
Give	an	L	a	0	0	I1	s	V.Dir	Narración	BL-FRE#086	A1	A1.give
Give	an	0	NA	0	0	I1	s	V.Dir	Narración	BL-FRE#088	A1	A1.give
Give	an	0	NA	0	0	0	NA	V.Dir	Narración	BL-FRE#116	A1	A1.give
Give	an	0	NA	0	0	I1	n	V.Dir	Entrevista	ET-MJC#121	A1	A1.give
Give	an	0	NA	0	0	I1	s	clm	Entrevista	ET-MLA#185	A1	A1.give
Give	an	0	NA	0	0	0	NA	V.Dir	Entrevista	ET-NXG#064	A1	A1.give
Give	an	0	NA	0	0	I1	n	V.Dir	Entrevista	ET-NXG#167	A1	A1.give
Give	an	0	NA	0	0	I1	s	V.Dir	Narración	PS-AFS#037	A1	A1.give
Give	an	0	NA	0	0	I1	s	clm	Narración	PS-FRE#111	A1	A1.give
Give	an	0	NA	0	0	I1	s	clm	Narración	PS-FRE#114	A1	A1.give
Give	an	0	NA	0	0	I1	s	clm	Narración	PS-FRE#119	A1	A1.give
Give	an	0	NA	0	0	I1	n	clm	Narración	PS-JRV#103	A1	A1.give
Give	an	0	NA	0	0	I1	n	clm	Narración	PS-JRV#104	A1	A1.give
Give	an	L	a	0	0	I1	n	clm	Narración	PS-MJC#116	A1	A1.give
Give	an	L	a	0	0	I1	n	clm	Ejemplos elicitados	VV-ARS#006	A1	A1.give
Give	an	L	a	0	0	I1	n	clm	Ejemplos elicitados	VV-ARS#049	A1	A1.give
Give	an	L	a	0	0	I1	n	V.Dir	Ejemplos elicitados	VV-ARS#053	A1	A1.give
Give	an	L	a	0	0	I1	s	clm	Ejemplos elicitados	VV-ARS#095	A1	A1.give
Give	an	L	a	0	0	I1	n	clm	Ejemplos elicitados	VV-ARS#097	A1	A1.give
Give	an	L	a	0	0	I1	n	V.Dir	Ejemplos elicitados	VV-FRE#043	A1	A1.give
Give	an	L	a	0	0	I1	n	clm	Ejemplos elicitados	VV-FRE#049	A1	A1.give
Give	an	0	NA	0	0	I1	s	V.Dir	Ejemplos elicitados	VV-FRE#053	A1	A1.give
Give	an	L	a	0	0	I1	n	V.Dir	Ejemplos elicitados	VV-FRE#095	A1	A1.give
Give	an	L	a	0	0	I1	n	V.Dir	Ejemplos elicitados	VV-JRV#046	A1	A1.give
Give	an	L	p	0	0	I1	s	V.Dir	Ejemplos elicitados	VV-JRV#054	A1	A1.give
Give	an	L	a	0	0	I1	s	V.Dir	Ejemplos elicitados	VV-JRV#055	A1	A1.give
Give	an	L	a	0	0	I1	n	V.Dir	Ejemplos elicitados	VV-JRV#101	A1	A1.give
Give	an	L	a	0	0	I1	s	V.Dir	Ejemplos elicitados	VV-JRV#102	A1	A1.give
Say	an	0	NA	R	0	0	NA	V.P	Narración	BL-FRE#063	A1	A1.say
Say	an	0	NA	R	0	0	NA	V.P	Otros	DC-ANV#011	A1	A1.say
Say	an	L	a	0	0	0	NA	V.P	Otros	DC-JMR#001	A1	A1.say
Say	an	0	NA	0	0	0	NA	V.P	Otros	DC-JMR#002	A1	A1.say
Say	an	0	NA	0	0	0	NA	V.P	Otros	DC-JMR#005	A1	A1.say
Say	an	0	NA	0	0	0	NA	V.P	Otros	DC-JMR#007	A1	A1.say
Say	an	L	a	0	0	0	NA	V.P	Otros	DC-JMR#009	A1	A1.say
Say	an	L	a	0	0	0	NA	V.P	Otros	DC-JMR#013	A1	A1.say
Say	an	L	a	0	0	I1	s	V.Dir	Entrevista	ET-MJC#014	A1	A1.say
Say	an	0	NA	0	0	0	NA	V.P	Entrevista	ET-MJC#048	A1	A1.say
Say	an	L	p	0	0	0	NA	V.Dir	Entrevista	ET-MLA#062	A1	A1.say
Say	an	0	NA	0	0	0	NA	V.P	Entrevista	ET-MLA#063	A1	A1.say
Say	an	0	NA	0	0	0	NA	V.P	Entrevista	ET-MLA#068	A1	A1.say
Say	an	0	NA	0	0	0	NA	V.P	Entrevista	ET-MLA#072	A1	A1.say
Say	an	0	NA	0	0	0	NA	V.P	Entrevista	ET-MLA#210	A1	A1.say
Say	an	L	a	0	0	0	NA	V.P	Entrevista	ET-NXG#041	A1	A1.say
Say	an	0	NA	0	0	0	NA	V.Dir	Entrevista	ET-NXG#063	A1	A1.say
Say	an	0	NA	0	0	0	NA	V.P	Entrevista	ET-NXG#082	A1	A1.say
Say	an	L	a	0	0	0	NA	V.P	Entrevista	ET-NXG#206	A1	A1.say
Say	an	0	NA	R	0	0	NA	V.P	Narración	HC-JMR#011	A1	A1.say
Say	an	0	NA	0	0	0	NA	V.Dir	Narración	HC-JMR#017	A1	A1.say
Say	an	L	a	0	0	0	NA	V.Dir	Ejemplos elicitados	VV-ARS#026	A1	A1.say
Say	an	L	a	0	0	I1	n	V.Dir	Ejemplos elicitados	VV-ARS#047	A1	A1.say
Say	an	L	a	0	0	I1	n	V.Dir	Ejemplos elicitados	VV-FRE#026	A1	A1.say
Say	an	L	a	0	0	I1	s	V.Dir	Ejemplos elicitados	VV-FRE#047	A1	A1.say
Say	an	L	a	0	0	I1	n	V.Dir	Ejemplos elicitados	VV-JRV#029	A1	A1.say
Say	an	L	a	0	0	I1	n	V.Dir	Ejemplos elicitados	VV-JRV#050	A1	A1.say
Say	an	L	a	0	0	I1	s	V.Dir	Ejemplos elicitados	VV-JRV#051	A1	A1.say
Say	an	0	NA	0	0	0	NA	V.P	Drama	WS-BIE#053	A1	A1.say
Explain	an	0	NA	R	0	0	NA	V.Dir	Narración	BL-FRE#079	A1	A1.explain
Explain	an	0	NA	0	0	I1	n	V.Dir	Narración	BL-FRE#119	A1	A1.explain
Explain	an	0	NA	R	0	0	NA	V.Dir	Narración	BL-FRE#162	A1	A1.explain
Explain	an	0	NA	0	0	I1	n	V.Dir	Narración	BL-FRE#166	A1	A1.explain
Explain	an	0	NA	0	0	I1	n	V.Dir	Entrevista	ET-JAG#056	A1	A1.explain
Explain	an	0	NA	0	0	I1	n	V.Dir	Entrevista	ET-JAG#057	A1	A1.explain
Explain	an	0	NA	0	0	I1	n	V.Dir	Entrevista	ET-MJC#131	A1	A1.explain
Explain	an	0	NA	0	0	0	NA	V.Dir	Entrevista	ET-MLA#073	A1	A1.explain
Explain	an	0	NA	0	0	I1	n	V.Dir	Entrevista	ET-NXG#090	A1	A1.explain
Explain	an	L	a	0	0	I1	n	V.Dir	Entrevista	ET-NXG#124	A1	A1.explain
Explain	an	L	a	0	0	I1	s	V.Dir	Entrevista	ET-NXG#125	A1	A1.explain
Explain	an	L	a	0	0	0	NA	V.Dir	Narración	HC-JRV#002	A1	A1.explain
Explain	an	L	a	0	0	0	NA	V.Dir	Narración	HC-JRV#010	A1	A1.explain
Explain	an	L	a	0	0	0	NA	V.Dir	Narración	HC-JRV#014	A1	A1.explain
Explain	an	0	NA	0	0	0	NA	V.Dir	Narración	VS-CBB#035	A1	A1.explain
Explain	an	L	a	0	0	I1	n	V.Dir	Ejemplos elicitados	VV-ARS#012	A1	A1.explain
Explain	an	L	a	0	0	I1	n	V.Dir	Ejemplos elicitados	VV-FRE#012	A1	A1.explain
Explain	an	0	NA	0	0	I1	n	V.Dir	Ejemplos elicitados	VV-FRE#027	A1	A1.explain
Explain	an	L	a	0	0	I1	s	V.Dir	Drama	WS-BIE#019	A1	A1.explain
Speak	an	0	NA	0	0	0	NA	V.P	Entrevista	ET-MJC#049	A1	A1.speak
Speak	an	0	NA	0	0	0	NA	V.P	Entrevista	ET-MJC#051	A1	A1.speak
Speak	an	0	NA	0	0	0	NA	V.P	Entrevista	ET-MJC#073	A1	A1.speak
Speak	an	0	NA	0	0	0	NA	V.P	Entrevista	ET-MJC#074	A1	A1.speak
Speak	an	L	a	0	0	0	NA	V.P	Entrevista	ET-MJC#082	A1	A1.speak
Speak	an	0	NA	0	0	0	NA	V.P	Entrevista	ET-MJC#088	A1	A1.speak
Speak	an	0	NA	0	0	0	NA	V.P	Entrevista	ET-MJC#090	A1	A1.speak
Speak	an	0	NA	R	0	0	NA	V.P	Entrevista	ET-MJC#092	A1	A1.speak
Speak	an	0	NA	0	0	0	NA	V.P	Entrevista	ET-MJC#125	A1	A1.speak
Speak	an	0	NA	0	0	0	NA	V.P	Entrevista	ET-MJC#126	A1	A1.speak
Speak	an	L	a	0	0	0	NA	V.P	Entrevista	ET-MJC#128	A1	A1.speak
Speak	an	0	NA	0	0	0	NA	V.P	Entrevista	ET-MJC#157	A1	A1.speak
Speak	an	L	a	0	0	0	NA	V.P	Entrevista	ET-MLA#019	A1	A1.speak
Speak	an	0	NA	0	0	0	NA	V.P	Entrevista	ET-MLA#079	A1	A1.speak
Speak	an	L	a	0	0	0	NA	V.P	Entrevista	ET-MLA#083	A1	A1.speak
Speak	an	L	a	0	0	0	NA	V.P	Entrevista	ET-MLA#094	A1	A1.speak
Speak	an	0	NA	0	0	0	NA	V.P	Entrevista	ET-MLA#095	A1	A1.speak
Speak	an	0	NA	0	0	0	NA	V.P	Entrevista	ET-MLA#096	A1	A1.speak
Speak	an	0	NA	0	0	0	NA	V.P	Entrevista	ET-MLA#123	A1	A1.speak
Speak	an	L	a	0	0	0	NA	V.P	Entrevista	ET-MLA#124	A1	A1.speak
Speak	an	0	NA	0	0	0	NA	V.P	Entrevista	ET-MLA#128	A1	A1.speak
Speak	an	0	NA	0	0	0	NA	V.P	Entrevista	ET-MLA#130	A1	A1.speak
Speak	an	0	NA	0	0	0	NA	V.P	Entrevista	ET-MLA#134	A1	A1.speak
Speak	an	0	NA	0	0	0	NA	V.P	Entrevista	ET-MLA#136	A1	A1.speak
Speak	an	0	NA	0	0	0	NA	V.P	Entrevista	ET-MLA#140	A1	A1.speak
Speak	an	0	NA	R	0	0	NA	V.P	Entrevista	ET-MLA#159	A1	A1.speak
Speak	an	0	NA	0	0	0	NA	V.P	Entrevista	ET-MLA#166	A1	A1.speak
Speak	an	0	NA	0	0	0	NA	V.P	Entrevista	ET-MLA#168	A1	A1.speak
Speak	an	L	p	0	0	0	NA	V.P	Entrevista	ET-NXG#101	A1	A1.speak
Speak	an	0	NA	0	0	0	NA	V.P	Entrevista	ET-NXG#150	A1	A1.speak
Speak	an	L	a	0	0	0	NA	V.P	Entrevista	ET-NXG#193	A1	A1.speak
Speak	an	0	NA	0	0	0	NA	V.P	Entrevista	ET-NXG#224	A1	A1.speak
Speak	an	0	NA	0	0	0	NA	V.P	Entrevista	ET-NXG#228	A1	A1.speak
Speak	an	0	NA	0	0	0	NA	V.P	Entrevista	ET-NXG#263	A1	A1.speak
Speak	an	L	a	0	0	0	NA	V.P	Ejemplos elicitados	VV-JRV#012	A1	A1.speak
Speak	an	L	a	0	0	0	NA	V.P	Ejemplos elicitados	VV-JRV#013	A1	A1.speak
Speak	an	L	a	0	0	0	NA	V.P	Ejemplos elicitados	VV-JRV#030	A1	A1.speak
Go	an	L	a	0	0	0	NA	V.L	Narración	BL-FRE#077	A1	A1.go
Go	an	0	NA	0	0	0	NA	V.L	Narración	BL-FRE#111	A1	A1.go
Go	an	0	NA	0	0	0	NA	V.L	Narración	BL-FRE#113	A1	A1.go
Go	an	0	NA	0	0	I1	n	V.L	Otros	DC-JMR#004	A1	A1.go
Go	an	0	NA	0	0	0	NA	V.L	Entrevista	ET-JAG#072	A1	A1.go
Go	an	L	a	0	0	0	NA	V.L	Entrevista	ET-JAG#079	A1	A1.go
Go	an	0	NA	0	0	0	NA	V.L	Entrevista	ET-MJC#184	A1	A1.go
Go	an	0	NA	0	0	0	NA	V.L	Entrevista	ET-MLA#069 ET-MLA#070	A1	A1.go
Go	an	L	a	0	0	0	NA	V.L	Entrevista	ET-MLA#119	A1	A1.go
Go	an	L	a	0	0	0	NA	V.L	Entrevista	ET-NXG#113	A1	A1.go
Go	an	0	NA	0	0	0	NA	V.L	Entrevista	ET-NXG#170	A1	A1.go
Go	an	0	NA	0	0	0	NA	V.L	Narración	HC-JRV#076	A1	A1.go
Go	an	0	NA	0	0	0	NA	V.L	Narración	PS-AFS#005	A1	A1.go
Go	an	0	NA	0	0	0	NA	V.L	Narración	PS-AFS#039	A1	A1.go
Go	an	0	NA	0	0	0	NA	V.L	Narración	VS-CBB#021	A1	A1.go
Go	an	0	NA	0	0	0	NA	V.L	Narración	VS-CBB#022	A1	A1.go
Go	an	0	NA	0	0	0	NA	V.L	Narración	VS-CBB#039	A1	A1.go
Go	an	L	a	0	0	0	NA	V.L	Narración	VS-CBB#045	A1	A1.go
Go	an	L	a	0	0	I1	n	V.L	Ejemplos elicitados	VV-ARS#037	A1	A1.go
Go	an	L	a	0	0	I1	n	V.L	Ejemplos elicitados	VV-FRE#037	A1	A1.go
Go	an	L	a	0	0	0	NA	V.L	Ejemplos elicitados	VV-JRV#040	A1	A1.go
Go	an	L	a	0	0	0	NA	V.L	Drama	WS-BIE#144	A1	A1.go
Carry	an	0	NA	0	0	0	NA	V.L	Entrevista	ET-JAG#054	A1	A1.carry
Carry	an	0	NA	0	0	0	NA	V.L	Entrevista	ET-MJC#095	A1	A1.carry
Carry	an	0	NA	0	0	0	NA	V.L	Entrevista	ET-MJC#171	A1	A1.carry
Carry	an	0	NA	0	0	0	NA	V.L	Entrevista	ET-MJC#173	A1	A1.carry
Carry	an	0	NA	0	0	0	NA	V.L	Entrevista	ET-MJC#179	A1	A1.carry
Carry	an	0	NA	0	0	0	NA	V.L	Entrevista	ET-MLA#142	A1	A1.carry
Carry	an	0	NA	0	0	0	NA	clm	Narración	HR-FRE#122	A1	A1.carry
Carry	an	0	NA	0	0	0	NA	clm	Narración	HR-FRE#123	A1	A1.carry
Carry	an	0	NA	0	0	0	NA	clm	Narración	PS-JRV#122	A1	A1.carry
Carry	an	0	NA	0	0	0	NA	clm	Ejemplos elicitados	VV-ARS#056	A1	A1.carry
Carry	an	L	a	0	0	0	NA	V.L	Ejemplos elicitados	VV-FRE#056	A1	A1.carry
Carry	an	L	a	0	0	0	NA	V.L	Ejemplos elicitados	VV-FRE#069	A1	A1.carry
Carry	an	L	a	0	0	0	NA	clm	Ejemplos elicitados	VV-JRV#062	A1	A1.carry
Look	an	0	NA	R	0	0	NA	V.Dir	Narración	BL-FRE#018	A1	A1.look
Look	an	0	NA	R	0	0	NA	V.Dir	Narración	BL-FRE#019	A1	A1.look
Look	an	L	a	R	0	0	NA	V.Dir	Narración	BL-FRE#022	A1	A1.look
Look	an	0	NA	R	0	0	NA	V.Dir	Narración	BL-FRE#106	A1	A1.look
Look	an	0	NA	R	0	0	NA	V.Dir	Narración	BL-FRE#143	A1	A1.look
Look	an	0	NA	R	0	0	NA	V.Dir	Narración	BL-FRE#145	A1	A1.look
Look	an	0	NA	R	0	0	NA	V.Dir	Narración	BL-FRE#149	A1	A1.look
Look	an	0	NA	R	0	0	NA	V.Dir	Narración	BL-FRE#160	A1	A1.look
Look	an	0	NA	R	0	0	NA	V.Dir	Narración	BL-FRE#170	A1	A1.look
Look	an	0	NA	R	0	0	NA	V.Dir	Narración	BL-FRE#179	A1	A1.look
Look	an	0	NA	R	cld	0	NA	V.Dir	Narración	BL-FRE#191	A1	A1.look
Look	an	0	NA	R	0	I1	s	V.Dir	Entrevista	ET-JAG#107	A1	A1.look
Look	an	L	a	R	0	I1	s	V.Dir	Entrevista	ET-MJC#085	A1	A1.look
Look	an	0	NA	R	0	I1	s	V.Dir	Entrevista	ET-MJC#105	A1	A1.look
Look	an	0	NA	0	0	I1	s	V.Dir	Entrevista	ET-MJC#114	A1	A1.look
Look	an	0	NA	R	0	I1	s	V.Dir	Entrevista	ET-MJC#116	A1	A1.look
Look	an	0	NA	0	0	0	NA	V.Dir	Entrevista	ET-MJC#117	A1	A1.look
Look	an	L	a	0	0	0	NA	V.Dir	Entrevista	ET-MLA#022	A1	A1.look
Look	an	L	a	0	0	0	NA	V.Dir	Entrevista	ET-MLA#029	A1	A1.look
Look	an	0	NA	0	0	I1	n	V.Dir	Entrevista	ET-NXG#035	A1	A1.look
Look	an	0	NA	0	0	I1	n	V.Dir	Entrevista	ET-NXG#036	A1	A1.look
Look	an	L	a	0	0	0	NA	V.Dir	Entrevista	ET-NXG#204	A1	A1.look
Look	an	L	a	0	0	0	NA	V.Dir	Entrevista	ET-NXG#215	A1	A1.look
Look	an	L	a	0	0	0	NA	V.Dir	Entrevista	ET-NXG#255	A1	A1.look
Look	an	L	a	0	0	I1	n	V.Dir	Entrevista	ET-NXG#258	A1	A1.look
Look	an	L	a	R	0	I1	s	V.Dir	Narración	HC-JRV#042	A1	A1.look
Look	an	0	NA	0	0	I1/i2	n	V.Dir	Narración	HC-JRV#097	A1	A1.look
Look	an	0	NA	0	0	I1	s	V.Dir	Narración	HC-JRV#098	A1	A1.look
Look	an	L	p	0	0	0	NA	V.Dir	Narración	HC-JRV#154	A1	A1.look
Look	an	0	NA	0	0	I1	s	V.Dir	Narración	HC-JRV#156	A1	A1.look
Look	an	0	NA	R	0	0	NA	V.Dir	Narración	HC-JRV#187	A1	A1.look
Look	an	0	NA	0	0	0	NA	V.Dir	Narración	HC-JRV#188	A1	A1.look
Look	an	L	a	0	0	I1	n	V.Dir	Narración	HR-AFS#016	A1	A1.look
Look	an	0	NA	0	0	I1	s	V.Dir	Narración	HR-ARS#002	A1	A1.look
Look	an	L	a	R	0	I1	s	V.Dir	Narración	HR-ARS#008	A1	A1.look
Look	an	0	NA	0	0	I1	s	V.Dir	Narración	HR-ARS#013	A1	A1.look
Look	an	0	NA	0	0	0	NA	V.Dir	Narración	HR-ARS#020	A1	A1.look
Look	an	L	a	R	0	0	NA	V.Dir	Narración	HR-ARS#028	A1	A1.look
Look	an	0	NA	R	0	I1	s	V.Dir	Narración	HR-ARS#032	A1	A1.look
Look	an	0	NA	R	0	0	NA	V.Dir	Narración	HR-ARS#041	A1	A1.look
Look	an	0	NA	R	0	0	NA	V.Dir	Narración	HR-ARS#043	A1	A1.look
Look	an	0	NA	R	0	0	NA	V.Dir	Narración	HR-ARS#056	A1	A1.look
Look	an	0	NA	R	0	I1	s	V.Dir	Narración	HR-ARS#063	A1	A1.look
Look	an	0	NA	R	0	I1	s	V.Dir	Narración	HR-ARS#070	A1	A1.look
Look	an	0	NA	R	0	I1	s	V.Dir	Narración	HR-ARS#076	A1	A1.look
Look	an	L	a	R	0	I1	s	V.Dir	Narración	HR-ARS#082	A1	A1.look
Look	an	0	NA	0	0	I1	s	V.Dir	Narración	HR-CBB#004	A1	A1.look
Look	an	0	NA	R	0	I1	n	V.Dir	Narración	HR-FRE#005	A1	A1.look
Look	an	0	NA	R	0	I1	s	V.Dir	Narración	HR-FRE#018	A1	A1.look
Look	an	0	NA	R	0	I1	n	V.Dir	Narración	HR-FRE#026	A1	A1.look
Look	an	L	a	0	0	0	NA	V.Dir	Narración	HR-FRE#035	A1	A1.look
Look	an	0	NA	0	0	I1	s	V.Dir	Narración	HR-FRE#037	A1	A1.look
Look	an	0	NA	R	0	I1	n	V.Dir	Narración	HR-FRE#044	A1	A1.look
Look	an	0	NA	0	0	I1	s	V.Dir	Narración	HR-FRE#050	A1	A1.look
Look	an	0	NA	0	0	I1	s	V.Dir	Narración	HR-FRE#053	A1	A1.look
Look	an	L	a	0	0	I1	s	V.Dir	Narración	HR-FRE#063	A1	A1.look
Look	an	0	NA	R	0	I1	s	V.Dir	Narración	HR-FRE#078	A1	A1.look
Look	an	0	NA	R	0	0	NA	V.Dir	Narración	HR-FRE#079	A1	A1.look
Look	an	0	NA	0	0	I1	n	V.Dir	Narración	HR-FRE#081	A1	A1.look
Look	an	0	NA	0	0	I1	n	V.Dir	Narración	HR-FRE#082	A1	A1.look
Look	an	0	NA	R	0	I1	s	V.Dir	Narración	HR-FRE#094	A1	A1.look
Look	an	0	NA	R	0	I1	s	V.Dir	Narración	HR-FRE#096	A1	A1.look
Look	an	0	NA	R	0	I1	s	V.Dir	Narración	HR-FRE#097	A1	A1.look
Look	an	0	NA	0	0	I1/i2	s	V.Dir	Narración	HR-FRE#099	A1	A1.look
Look	an	L	a	0	0	I1	s	V.Dir	Narración	HR-FRE#100	A1	A1.look
Look	an	0	NA	0	0	I1/i2	s	V.Dir	Narración	HR-FRE#101	A1	A1.look
Look	an	L	a	R	0	I1	s	V.Dir	Narración	HR-FRE#110	A1	A1.look
Look	an	0	NA	R	0	I1	s	V.Dir	Narración	HR-FRE#111	A1	A1.look
Look	an	0	NA	R	0	I1	n	V.Dir	Narración	HR-FRE#115	A1	A1.look
Look	an	L	a	R	0	I1	s	V.Dir	Narración	HR-MJC#007	A1	A1.look
Look	an	L	a	R	0	I1	s	V.Dir	Narración	HR-MJC#009	A1	A1.look
Look	an	0	NA	R	0	I1	s	V.Dir	Narración	HR-MJC#020	A1	A1.look
Look	an	0	NA	R	0	I1	s	V.Dir	Narración	HR-MJC#022	A1	A1.look
Look	an	L	a	R	0	I1	s	V.Dir	Narración	HR-MJC#035	A1	A1.look
Look	an	0	NA	R	0	I1	s	V.Dir	Narración	HR-MJC#043	A1	A1.look
Look	an	0	NA	R	0	I1	s	V.Dir	Narración	HR-MJC#051	A1	A1.look
Look	an	0	NA	R	0	I1	s	V.Dir	Narración	HR-MJC#069	A1	A1.look
Look	an	L	a	R	0	I1	s	V.Dir	Narración	HR-MJC#072	A1	A1.look
Look	an	0	NA	R	0	I1	s	V.Dir	Narración	HR-MJC#077	A1	A1.look
Look	an	L	a	R	0	I1	s	V.Dir	Narración	HR-MJC#084	A1	A1.look
Look	an	0	NA	R	0	I1	s	V.Dir	Narración	HR-MJC#089	A1	A1.look
Look	an	0	NA	R	0	I1	s	V.Dir	Narración	HR-MJC#093	A1	A1.look
Look	an	0	NA	R	0	I1	s	V.Dir	Narración	HR-MJC#094	A1	A1.look
Look	an	0	NA	R	0	I1	s	V.Dir	Narración	HR-MJC#106	A1	A1.look
Look	an	0	NA	R	0	I1	s	V.Dir	Narración	HR-MJC#111	A1	A1.look
Look	an	0	NA	R	0	I1	s	V.Dir	Narración	HR-MJC#144	A1	A1.look
Look	an	0	NA	R	0	I1	s	V.Dir	Narración	HR-MJC#151	A1	A1.look
Look	an	0	NA	R	0	I1	s	V.Dir	Narración	HR-MJC#153	A1	A1.look
Look	an	0	NA	R	0	I1	s	V.Dir	Narración	PS-FRE#043	A1	A1.look
Look	an	0	NA	R	0	I1	n	V.Dir	Narración	PS-FRE#045	A1	A1.look
Look	an	0	NA	R	0	I1	n	V.Dir	Narración	PS-FRE#046	A1	A1.look
Look	an	0	NA	R	0	I1	n	V.Dir	Narración	PS-FRE#047	A1	A1.look
Look	an	0	NA	R	0	0	NA	V.Dir	Narración	PS-FRE#049	A1	A1.look
Look	an	0	NA	R	0	0	NA	V.Dir	Narración	PS-FRE#050	A1	A1.look
Look	an	0	NA	0	0	I1/i2	s	V.Dir	Narración	PS-FRE#068	A1	A1.look
Look	an	0	NA	R	0	I1	s	V.Dir	Narración	PS-FRE#085	A1	A1.look
Look	an	0	NA	R	0	I1	s	V.Dir	Narración	PS-FRE#107	A1	A1.look
Look	an	0	NA	R	0	0	NA	V.Dir	Narración	PS-JRV#023	A1	A1.look
Look	an	0	NA	R	0	I1	s	V.Dir	Narración	PS-JRV#029	A1	A1.look
Look	an	0	NA	R	0	I1	s	V.Dir	Narración	PS-JRV#031	A1	A1.look
Look	an	0	NA	R	0	I1	s	V.Dir	Narración	PS-JRV#033	A1	A1.look
Look	an	0	NA	R	0	I1	s	V.Dir	Narración	PS-JRV#036	A1	A1.look
Look	an	0	NA	0	0	I1	s	V.Dir	Narración	PS-JRV#061	A1	A1.look
Look	an	0	NA	0	0	I1	s	V.Dir	Narración	PS-JRV#071	A1	A1.look
Look	an	0	NA	R	0	I1	s	V.Dir	Narración	PS-JRV#073	A1	A1.look
Look	an	0	NA	R	0	I1	s	V.Dir	Narración	PS-JRV#075	A1	A1.look
Look	an	L	a	0	0	I1	s	V.Dir	Narración	PS-JRV#095	A1	A1.look
Look	an	0	NA	R	0	I1	s	V.Dir	Narración	PS-JRV#100	A1	A1.look
Look	an	0	NA	R	0	I1	n	V.Dir	Narración	PS-JRV#115	A1	A1.look
Look	an	0	NA	R	0	I1	n	V.Dir	Narración	PS-JRV#117	A1	A1.look
Look	an	0	NA	R	0	I1	s	V.Dir	Narración	PS-JRV#121	A1	A1.look
Look	an	0	NA	R	0	I1	s	V.Dir	Narración	PS-MJC#023	A1	A1.look
Look	an	0	NA	R	0	I1	s	V.Dir	Narración	PS-MJC#045	A1	A1.look
Look	an	0	NA	R	0	I1	s	V.Dir	Narración	PS-MJC#046	A1	A1.look
Look	an	0	NA	R	0	I1	s	V.Dir	Narración	PS-MJC#049	A1	A1.look
Look	an	0	NA	R	0	I1	s	V.Dir	Narración	PS-MJC#051	A1	A1.look
Look	an	0	NA	R	0	I1	s	V.Dir	Narración	PS-MJC#052	A1	A1.look
Look	an	0	NA	R	0	I1	s	V.Dir	Narración	PS-MJC#091	A1	A1.look
Look	an	0	NA	R	0	I1	s	V.Dir	Narración	PS-MJC#096	A1	A1.look
Look	an	0	NA	R	0	I1	s	V.Dir	Narración	PS-MJC#110	A1	A1.look
Look	an	0	NA	R	0	I1	s	V.Dir	Narración	PS-MJC#111	A1	A1.look
Look	an	0	NA	R	0	I1	s	V.Dir	Narración	PS-MJC#131	A1	A1.look
Look	an	0	NA	R	0	I1	s	V.Dir	Narración	PS-MJC#135	A1	A1.look
Look	an	L	a	0	0	I1	n	V.Dir	Ejemplos elicitados	VV-ARS#031	A1	A1.look
Look	an	L	a	0	0	I1	s	V.Dir	Ejemplos elicitados	VV-ARS#032	A1	A1.look
Look	an	L	a	0	0	I1	n	V.Dir	Ejemplos elicitados	VV-ARS#041	A1	A1.look
Look	an	L	a	R	0	I1	n	V.Dir	Ejemplos elicitados	VV-ARS#042	A1	A1.look
Look	an	L	a	0	0	I1	n	V.Dir	Ejemplos elicitados	VV-ARS#094	A1	A1.look
Look	an	L	a	0	0	I1	n	V.Dir	Ejemplos elicitados	VV-FRE#031	A1	A1.look
Look	an	L	a	0	0	I1	s	V.Dir	Ejemplos elicitados	VV-FRE#032	A1	A1.look
Look	an	0	NA	0	0	I1	s	V.Dir	Ejemplos elicitados	VV-FRE#034	A1	A1.look
Look	an	L	a	0	0	I1	n	V.Dir	Ejemplos elicitados	VV-FRE#041	A1	A1.look
Look	an	L	a	0	0	I1	n	V.Dir	Ejemplos elicitados	VV-FRE#094	A1	A1.look
Look	an	L	a	0	0	I1	s	V.Dir	Ejemplos elicitados	VV-JRV#001	A1	A1.look
Look	an	L	a	0	0	I1	s	V.Dir	Ejemplos elicitados	VV-JRV#034	A1	A1.look
Look	an	L	a	0	0	I1	s	V.Dir	Ejemplos elicitados	VV-JRV#035	A1	A1.look
Look	an	L	a	0	0	I1	n	V.Dir	Ejemplos elicitados	VV-JRV#044	A1	A1.look
Look	an	0	NA	0	0	0	NA	V.Dir	Ejemplos elicitados	VV-JRV#099	A1	A1.look
Look	an	L	a	0	0	0	NA	V.Dir	Ejemplos elicitados	VV-JRV#100	A1	A1.look
Think	an	0	NA	0	0	0	NA	V.P	Narración	BL-FRE#052	A1	A1.think
Think	an	0	NA	0	0	0	NA	V.P	Narración	BL-FRE#054	A1	A1.think
Think	an	0	NA	0	0	0	NA	V.P	Narración	BL-FRE#058	A1	A1.think
Think	an	L	a	0	0	0	NA	V.P	Narración	BL-FRE#076	A1	A1.think
Think	an	0	NA	0	0	0	NA	V.P	Narración	BL-FRE#095	A1	A1.think
Think	an	0	NA	0	0	0	NA	V.P	Narración	BL-FRE#100	A1	A1.think
Think	an	0	NA	0	0	0	NA	V.P	Narración	BL-FRE#104	A1	A1.think
Think	an	0	NA	0	0	0	NA	V.P	Narración	BL-FRE#110	A1	A1.think
Think	an	0	NA	0	0	0	NA	V.P	Narración	BL-FRE#130	A1	A1.think
Think	an	L	a	0	0	0	NA	V.P	Entrevista	ET-MLA#132	A1	A1.think
Think	an	L	a	0	0	0	NA	V.P	Entrevista	ET-NXG#022	A1	A1.think
Think	an	L	a	0	0	0	NA	V.P	Entrevista	ET-NXG#032	A1	A1.think
Think	an	0	NA	0	0	0	NA	V.P	Entrevista	ET-NXG#176	A1	A1.think
Think	an	0	NA	0	0	0	NA	V.P	Entrevista	ET-NXG#178	A1	A1.think
Think	an	L	a	0	0	0	NA	V.P	Entrevista	ET-NXG#185	A1	A1.think
Think	an	L	a	0	0	0	NA	V.P	Ejemplos elicitados	VV-ARS#051	A1	A1.think
Think	an	L	a	0	0	0	NA	V.P	Ejemplos elicitados	VV-ARS#100	A1	A1.think
Think	an	L	a	0	0	0	NA	V.P	Ejemplos elicitados	VV-FRE#051	A1	A1.think
Think	an	L	a	0	0	I1	s	V.P	Ejemplos elicitados	VV-FRE#053	A1	A1.think
Think	an	L	a	0	0	0	NA	V.P	Ejemplos elicitados	VV-FRE#100	A1	A1.think
Think	an	L	a	0	0	0	NA	V.P	Ejemplos elicitados	VV-JRV#057	A1	A1.think
Think	an	L	a	0	0	0	NA	V.P	Drama	WS-BIE#036	A1	A1.think
Think	an	L	a	0	0	0	NA	V.P	Drama	WS-BIE#043	A1	A1.think
Sign	an	0	NA	0	0	0	NA	V.P	Entrevista	ET-JAG#076	A1	A1.sign
Sign	an	0	NA	0	0	0	NA	V.P	Entrevista	ET-MJC#010	A1	A1.sign
Sign	an	0	NA	0	0	0	NA	V.P	Entrevista	ET-MJC#089	A1	A1.sign
Sign	an	0	NA	R	0	0	NA	V.P	Entrevista	ET-MJC#107	A1	A1.sign
Sign	an	L	a	0	0	0	NA	V.P	Entrevista	ET-MJC#108	A1	A1.sign
Sign	an	0	NA	0	0	I1	s	V.P	Entrevista	ET-MJC#114	A1	A1.sign
Sign	an	0	NA	0	0	0	NA	V.P	Entrevista	ET-MJC#115	A1	A1.sign
Sign	an	0	NA	0	0	0	NA	V.P	Entrevista	ET-MJC#118	A1	A1.sign
Sign	an	0	NA	0	0	0	NA	V.P	Entrevista	ET-MJC#122	A1	A1.sign
Sign	an	L	a	0	0	0	NA	V.P	Entrevista	ET-MJC#123	A1	A1.sign
Sign	an	0	NA	0	0	0	NA	V.P	Entrevista	ET-MLA#048	A1	A1.sign
Sign	an	0	NA	0	0	0	NA	V.P	Entrevista	ET-MLA#080	A1	A1.sign
Sign	an	L	a	0	0	0	NA	V.P	Entrevista	ET-MLA#082	A1	A1.sign
Sign	an	L	a	0	0	0	NA	V.P	Entrevista	ET-MLA#088	A1	A1.sign
Sign	an	L	a	0	0	0	NA	V.P	Entrevista	ET-MLA#089	A1	A1.sign
Sign	an	L	a	0	0	0	NA	V.P	Entrevista	ET-MLA#099	A1	A1.sign
Sign	an	0	NA	0	0	0	NA	V.P	Entrevista	ET-MLA#122	A1	A1.sign
Sign	an	L	a	0	0	0	NA	V.P	Entrevista	ET-MLA#125	A1	A1.sign
Sign	an	L	a	0	0	0	NA	V.P	Entrevista	ET-MLA#143	A1	A1.sign
Sign	an	0	NA	0	0	0	NA	V.P	Entrevista	ET-MLA#154	A1	A1.sign
Sign	an	0	NA	0	0	0	NA	V.P	Entrevista	ET-MLA#161	A1	A1.sign
Sign	an	0	NA	0	0	0	NA	V.P	Entrevista	ET-MLA#163	A1	A1.sign
Sign	an	0	NA	0	0	0	NA	V.P	Entrevista	ET-MLA#170	A1	A1.sign
Sign	an	0	NA	0	0	0	NA	V.P	Entrevista	ET-MLA#172	A1	A1.sign
Sign	an	L	a	0	0	0	NA	V.P	Entrevista	ET-MLA#206	A1	A1.sign
Sign	an	L	a	0	0	0	NA	V.P	Entrevista	ET-NXG#100	A1	A1.sign
Sign	an	L	a	0	0	0	NA	V.P	Entrevista	ET-NXG#129	A1	A1.sign
Sign	an	L	a	0	0	0	NA	V.P	Entrevista	ET-NXG#230	A1	A1.sign
Sign	an	0	NA	0	0	0	NA	V.P	Entrevista	ET-NXG#265	A1	A1.sign
Sign	an	0	NA	0	0	0	NA	V.P	Entrevista	ET-NXG#269	A1	A1.sign
Sign	an	L	a	0	0	0	NA	V.P	Drama	WS-BIE#118	A1	A1.sign
Leave	in	0	NA	0	0	I1	n	V.L	Narración	HC-JAG#019	A2	A2.leave
Leave	in	0	NA	0	cli	0	NA	cle	Narración	HC-JRV#074	A2	A2.leave
Leave	in	0	NA	0	cli	0	NA	cle	Narración	HC-JRV#120	A2	A2.leave
Leave	in	0	NA	0	cli	0	NA	cle	Narración	HC-JRV#210	A2	A2.leave
Leave	in	0	NA	0	cli	0	NA	cle	Narración	HR-AFS#015	A2	A2.leave
Leave	in	0	NA	0	cli	0	NA	cle	Narración	HR-AFS#026	A2	A2.leave
Leave	in	0	NA	0	cli	0	NA	cle	Narración	HR-FRE#012	A2	A2.leave
Leave	in	0	NA	0	cli	0	NA	cle	Narración	HR-FRE#061	A2	A2.leave
Leave	in	0	NA	0	cli	0	NA	cle	Narración	HR-MJC#083	A2	A2.leave
Leave	in	0	NA	0	cli	0	NA	cle	Narración	HR-MJC#104	A2	A2.leave
Leave	in	0	NA	0	cli	0	NA	cle	Narración	HR-MJC#105	A2	A2.leave
Leave	in	0	NA	0	0	I1	n	cle	Narración	PS-AFS#017	A2	A2.leave
Leave	in	0	NA	0	0	I1	n	cle	Narración	PS-FRE#028	A2	A2.leave
Leave	in	0	NA	0	0	I1	n	cle	Narración	PS-FRE#029	A2	A2.leave
Leave	in	0	NA	0	0	I1	n	cle	Narración	PS-FRE#030	A2	A2.leave
Leave	in	0	NA	0	0	I1	n	cle	Narración	PS-FRE#058	A2	A2.leave
Leave	in	0	NA	0	cli	0	NA	cle	Narración	PS-FRE#106	A2	A2.leave
Leave	in	0	NA	0	cli	0	NA	cle	Narración	PS-FRE#117	A2	A2.leave
Leave	in	0	NA	0	cli	0	NA	cle	Narración	PS-JRV#042	A2	A2.leave
Leave	in	0	NA	0	cli	0	NA	cle	Narración	PS-JRV#093	A2	A2.leave
Leave	in	L	a	0	cli	0	NA	V.L	Ejemplos elicitados	VV-ARS#068	A2	A2.leave
Throw	an	L	a	0	0	0	NA	V.L	Narración	BL-FRE#120	A2	A2.throw
Throw	an	0	NA	0	0	0	NA	V.L	Narración	BL-FRE#121	A2	A2.throw
Throw	an	0	NA	0	0	0	NA	V.L	Narración	BL-FRE#132	A2	A2.throw
Throw	in	0	NA	0	cli	0	NA	clm	Narración	PS-AFS#008	A2	A2.throw
Throw	in	0	NA	0	cli	0	NA	clm	Narración	PS-AFS#009	A2	A2.throw
Throw	in	L	a	0	0	0	NA	V.L	Narración	PS-AFS#034	A2	A2.throw
Throw	in	L	a	0	0	0	NA	V.L	Narración	PS-MJC#008	A2	A2.throw
Throw	in	0	NA	0	0	0	NA	V.L	Narración	PS-MJC#031	A2	A2.throw
Throw	in	L	a	0	0	0	NA	V.L	Narración	PS-MJC#103	A2	A2.throw
Throw	in	L	a	0	0	0	NA	V.L	Ejemplos elicitados	VV-ARS#046	A2	A2.throw
Throw	in	L	a	0	0	0	NA	V.L	Ejemplos elicitados	VV-ARS#090	A2	A2.throw
Throw	in	L	a	0	0	0	NA	V.L	Ejemplos elicitados	VV-FRE#046	A2	A2.throw
Throw	in	L	a	0	0	0	NA	V.L	Ejemplos elicitados	VV-FRE#090	A2	A2.throw
Throw	in	L	a	0	0	0	NA	V.L	Ejemplos elicitados	VV-JRV#049	A2	A2.throw
Throw	in	L	a	0	0	0	NA	V.L	Ejemplos elicitados	VV-JRV#096	A2	A2.throw
Help	an	0	NA	R	0	I2	s	V.Dir	Narración	BL-FRE#084	A2	A2.help
Help	an	0	NA	0	0	I2	n	V.Dir	Narración	BL-FRE#161	A2	A2.help
Help	an	0	NA	0	0	I2	n	V.Dir	Narración	BL-FRE#165	A2	A2.help
Help	an	L	s	0	0	I2	n	V.Dir	Narración	HR-CBB#043	A2	A2.help
Help	an	0	NA	0	0	I2	n	V.Dir	Narración	PS-AFS#032	A2	A2.help
Help	an	0	NA	0	0	I2	n	V.Dir	Narración	PS-FRE#086	A2	A2.help
Help	an	0	NA	0	0	I2	n	V.Dir	Narración	PS-JRV#081	A2	A2.help
Help	an	0	NA	0	0	I2	n	V.Dir	Narración	PS-JRV#083	A2	A2.help
Help	an	0	NA	0	0	I2	n	V.Dir	Narración	PS-MJC#092	A2	A2.help
Help	an	0	NA	0	0	I2	n	V.Dir	Narración	PS-MJC#102	A2	A2.help
Help	an	0	NA	R	0	I2	s	V.Dir	Ejemplos elicitados	VV-ARS#030	A2	A2.help
Help	an	L	s	0	0	I2	n	V.Dir	Ejemplos elicitados	VV-ARS#060	A2	A2.help
Help	an	0	NA	0	0	I2	n	V.Dir	Ejemplos elicitados	VV-ARS#073	A2	A2.help
Help	an	L	p	0	0	I2	s	V.Dir	Ejemplos elicitados	VV-FRE#030	A2	A2.help
Help	an	L	p	0	0	I2	n	V.Dir	Ejemplos elicitados	VV-FRE#057	A2	A2.help
Help	an	L	a	0	0	I2	n	V.Dir	Ejemplos elicitados	VV-FRE#060	A2	A2.help
Help	an	L	p	0	0	I2	n	V.Dir	Ejemplos elicitados	VV-FRE#073	A2	A2.help
Help	an	0	NA	0	0	I2	s	V.Dir	Ejemplos elicitados	VV-JRV#033	A2	A2.help
Help	an	L	a	0	0	I2	n	V.Dir	Ejemplos elicitados	VV-JRV#066	A2	A2.help
Help	an	0	NA	0	0	I2	n	V.Dir	Drama	WS-BIE#108	A2	A2.help
Search	an	0	NA	0	0	0	NA	V.P	Narración	BL-FRE#129	A2	A2.search
Search	an	0	NA	0	0	0	NA	V.P	Narración	BL-FRE#178	A2	A2.search
Search	an	0	NA	0	0	0	NA	V.P	Narración	BL-FRE#181	A2	A2.search
Search	an	0	NA	0	0	0	NA	V.P	Narración	BL-FRE#187	A2	A2.search
Search	an	0	NA	0	0	0	NA	V.P	Entrevista	ET-NXG#104 ET-NXG#105	A2	A2.search
Search	an	0	NA	0	0	0	NA	V.P	Narración	HR-AFS#039	A2	A2.search
Search	an	0	NA	0	0	0	NA	V.P	Narración	HR-ARS#010	A2	A2.search
Search	an	0	NA	0	0	0	NA	V.P	Narración	HR-ARS#012	A2	A2.search
Search	an	0	NA	0	0	0	NA	V.P	Narración	HR-ARS#021	A2	A2.search
Search	an	0	NA	0	0	0	NA	V.P	Narración	HR-ARS#026	A2	A2.search
Search	an	0	NA	0	0	0	NA	V.P	Narración	HR-ARS#027	A2	A2.search
Search	an	0	NA	0	0	0	NA	V.P	Narración	HR-ARS#030	A2	A2.search
Search	an	0	NA	0	0	0	NA	V.P	Narración	HR-CBB#029	A2	A2.search
Search	an	0	NA	0	0	0	NA	V.P	Narración	HR-CBB#034	A2	A2.search
Search	an	0	NA	0	0	0	NA	V.P	Narración	HR-CBB#040	A2	A2.search
Search	an	0	NA	0	0	0	NA	V.P	Narración	HR-FRE#029	A2	A2.search
Search	an	0	NA	0	0	0	NA	V.P	Narración	HR-MJC#032	A2	A2.search
Search	an	0	NA	0	0	0	NA	V.P	Narración	HR-MJC#034	A2	A2.search
Search	an	0	NA	0	0	0	NA	V.P	Narración	HR-MJC#042	A2	A2.search
Search	an	0	NA	0	0	0	NA	V.P	Narración	HR-MJC#044	A2	A2.search
Search	an	0	NA	0	0	I2	n	V.P	Narración	HR-MJC#048	A2	A2.search
Search	an	0	NA	0	0	0	NA	V.P	Narración	HR-MJC#065	A2	A2.search
Search	an	0	NA	0	0	0	NA	V.P	Narración	HR-MJC#090	A2	A2.search
Search	in	L	p	0	0	0	NA	V.P	Narración	VS-CBB#046	A2	A2.search
Search	an	L	p	0	0	0	NA	V.P	Ejemplos elicitados	VV-ARS#003	A2	A2.search
Search	an	L	p	0	0	0	NA	V.P	Ejemplos elicitados	VV-ARS#035	A2	A2.search
Search	an	L	a	0	0	0	NA	V.P	Ejemplos elicitados	VV-FRE#003	A2	A2.search
Search	an	L	p	0	0	0	NA	V.P	Ejemplos elicitados	VV-FRE#035	A2	A2.search
Search	an	0	NA	0	0	0	NA	V.P	Ejemplos elicitados	VV-FRE#048	A2	A2.search
Search	an	L	s	0	0	0	NA	V.P	Ejemplos elicitados	VV-JRV#003	A2	A2.search
Search	an	X	NA	0	0	0	NA	V.P	Ejemplos elicitados	VV-JRV#038	A2	A2.search
Search	an	L	p	0	0	0	NA	V.P	Drama	WS-BIE#092	A2	A2.search
Take	an	0	NA	0	cld	0	NA	clm	Narración	HR-AFS#053	A2	A2.take
Take	an	0	NA	0	cld	0	NA	clm	Narración	HR-AFS#055	A2	A2.take
Take	in	0	NA	0	cld	0	NA	clm	Narración	HR-MJC#112	A2	A2.take
Take	in	0	NA	0	cld	0	NA	clm	Narración	HR-MJC#117	A2	A2.take
Take	in	0	NA	0	cld	0	NA	clm	Narración	PS-FRE#081	A2	A2.take
Take	in	L	a	0	cli	0	NA	clm	Narración	PS-FRE#082	A2	A2.take
Take	in	0	NA	0	cld	0	NA	clm	Narración	PS-FRE#083	A2	A2.take
Take	in	0	NA	0	cld	0	NA	clm	Narración	PS-FRE#100	A2	A2.take
Take	in	0	NA	0	cld	0	NA	clm	Narración	PS-FRE#102	A2	A2.take
Take	in	0	NA	0	cld	0	NA	clm	Narración	PS-FRE#116	A2	A2.take
Take	in	0	NA	0	cld	0	NA	clm	Narración	PS-FRE#120	A2	A2.take
Take	in	0	NA	0	cld	0	NA	clm	Narración	PS-FRE#121	A2	A2.take
Take	in	0	NA	0	cld	0	NA	clm	Narración	PS-FRE#122	A2	A2.take
Take	in	0	NA	0	cld	0	NA	clm	Narración	PS-JRV#026	A2	A2.take
Take	in	0	NA	0	cld	0	NA	clm	Narración	PS-JRV#040	A2	A2.take
Take	in	0	NA	0	cld	0	NA	clm	Narración	PS-JRV#048	A2	A2.take
Take	in	0	NA	0	cld	0	NA	clm	Narración	PS-JRV#050	A2	A2.take
Take	in	0	NA	0	cld	0	NA	clm	Narración	PS-JRV#054	A2	A2.take
Take	in	0	NA	0	cld	0	NA	clm	Narración	PS-JRV#060	A2	A2.take
Take	in	0	NA	0	cld	0	NA	clm	Narración	PS-JRV#063	A2	A2.take
Take	in	0	NA	0	cld	0	NA	clm	Narración	PS-JRV#102	A2	A2.take
Take	in	0	NA	0	cld	0	NA	clm	Narración	PS-JRV#105	A2	A2.take
Take	in	0	NA	0	cld	0	NA	clm	Narración	PS-JRV#113	A2	A2.take
Take	in	0	NA	0	cld	0	NA	clm	Narración	PS-MJC#015	A2	A2.take
Take	in	0	NA	0	cld	0	NA	clm	Narración	PS-MJC#029	A2	A2.take
Take	in	0	NA	0	cld	0	NA	clm	Narración	PS-MJC#030	A2	A2.take
Take	in	0	NA	0	cld	0	NA	clm	Narración	PS-MJC#054	A2	A2.take
Take	in	0	NA	0	cld	0	NA	clm	Narración	PS-MJC#078	A2	A2.take
Take	in	0	NA	0	cld	0	NA	clm	Narración	PS-MJC#133	A2	A2.take
Take	in	L	a	0	cld	0	NA	clm	Ejemplos elicitados	VV-ARS#057	A2	A2.take
Take	in	0	NA	0	cld	0	NA	clm	Ejemplos elicitados	VV-FRE#078	A2	A2.take
Take	an	0	NA	0	cld	0	NA	clm	Narración	BL-FRE#024	A2	A2.take
Take	an	L	p	0	0	0	NA	V.P	Narración	BL-FRE#071	A2	A2.take
Take	an	0	NA	0	cld	0	NA	clm	Narración	BL-FRE#096	A2	A2.take
Take	an	0	NA	0	cld	0	NA	clm	Narración	BL-FRE#099	A2	A2.take
Take	an	0	NA	0	cld	0	NA	clm	Narración	BL-FRE#108	A2	A2.take
Take	an	0	NA	0	cld	0	NA	clm	Narración	BL-FRE#109	A2	A2.take
Take	an	0	NA	0	0	0	NA	V.P	Narración	BL-FRE#124	A2	A2.take
Take	an	0	NA	0	0	0	NA	V.P	Narración	HC-JMR#016	A2	A2.take
Take	an	L	a	0	0	0	NA	clm	Narración	HR-AFS#043	A2	A2.take
Take	an	L	a	0	0	0	NA	V.P	Narración	HR-ARS#017	A2	A2.take
Take	in	L	a	0	cld	0	NA	clm	Narración	HR-FRE#031	A2	A2.take
Take	an	0	NA	0	cld	0	NA	clm	Narración	HR-FRE#046	A2	A2.take
Take	an	0	NA	0	cld	0	NA	clm	Narración	HR-MJC#059	A2	A2.take
Take	an	0	NA	0	cld	0	NA	clm	Narración	HR-MJC#155	A2	A2.take
Take	in	L	a	0	0	0	NA	V.P	Narración	PS-AFS#007	A2	A2.take
Take	in	0	NA	0	0	0	NA	V.P	Narración	PS-AFS#033	A2	A2.take
Take	in	L	a	0	cld	0	NA	clm	Narración	PS-FRE#003	A2	A2.take
Take	in	0	NA	0	cld	0	NA	clm	Narración	PS-FRE#004	A2	A2.take
Take	in	0	NA	0	cld	0	NA	clm	Narración	PS-FRE#008	A2	A2.take
Take	in	0	NA	0	0	I2	n	V.P	Narración	PS-FRE#032	A2	A2.take
Take	in	0	NA	0	0	I2	n	V.P	Narración	PS-FRE#033	A2	A2.take
Take	in	0	NA	0	0	0	NA	V.P	Narración	PS-FRE#035	A2	A2.take
Take	in	0	NA	0	0	0	NA	V.P	Narración	PS-FRE#036	A2	A2.take
Take	in	0	NA	0	0	0	NA	V.P	Narración	PS-FRE#048	A2	A2.take
Take	in	0	NA	0	0	I2	n	V.P	Narración	PS-FRE#057	A2	A2.take
Take	in	0	NA	0	cld	0	NA	clm	Narración	PS-FRE#112	A2	A2.take
Take	in	L	a	0	cld	0	NA	clm	Narración	PS-FRE#114	A2	A2.take
Take	in	0	NA	0	cld	0	NA	clm	Narración	PS-JRV#007	A2	A2.take
Take	in	0	NA	0	cld	0	NA	clm	Narración	PS-JRV#009	A2	A2.take
Take	in	0	NA	0	cld	0	NA	clm	Narración	PS-JRV#011	A2	A2.take
Take	in	0	NA	0	cld	0	NA	clm	Narración	PS-JRV#013	A2	A2.take
Take	in	L	a	0	cld	0	NA	clm	Narración	PS-JRV#018	A2	A2.take
Take	in	0	NA	0	0	0	NA	V.P	Narración	PS-JRV#020	A2	A2.take
Take	in	0	NA	0	cld	0	NA	clm	Narración	PS-JRV#025	A2	A2.take
Take	in	0	NA	0	cld	0	NA	clm	Narración	PS-JRV#027	A2	A2.take
Take	in	0	NA	0	cld	0	NA	clm	Narración	PS-JRV#044	A2	A2.take
Take	in	0	NA	0	cld	0	NA	clm	Narración	PS-MJC#014	A2	A2.take
Take	in	0	NA	0	cld	0	NA	clm	Narración	PS-MJC#022	A2	A2.take
Take	in	0	NA	0	cld	0	NA	clm	Narración	PS-MJC#026	A2	A2.take
Take	in	0	NA	0	cld	0	NA	clm	Narración	PS-MJC#028	A2	A2.take
Take	in	0	NA	0	cld	0	NA	clm	Narración	PS-MJC#033	A2	A2.take
Take	in	0	NA	0	cld	0	NA	clm	Narración	PS-MJC#039	A2	A2.take
Take	in	0	NA	0	cld	0	NA	clm	Narración	PS-MJC#040	A2	A2.take
Take	in	0	NA	0	cld	0	NA	clm	Narración	PS-MJC#053	A2	A2.take
Take	in	0	NA	0	cld	0	NA	clm	Narración	PS-MJC#058	A2	A2.take
Take	in	0	NA	0	cld	0	NA	clm	Narración	PS-MJC#125	A2	A2.take
Take	in	0	NA	0	cld	0	NA	clm	Narración	PS-MJC#127	A2	A2.take
Take	an	0	NA	0	0	I1	s	V.P	Narración	VS-CBB#012	A2	A2.take
Take	in	L	p	0	0	0	NA	V.P	Ejemplos elicitados	VV-ARS#050	A2	A2.take
Take	in	0	NA	0	cld	0	NA	clm	Ejemplos elicitados	VV-ARS#075	A2	A2.take
Take	in	L	a	0	0	0	NA	V.P	Ejemplos elicitados	VV-FRE#050	A2	A2.take
Take	in	0	NA	0	cld	0	NA	clm	Ejemplos elicitados	VV-FRE#075	A2	A2.take
Take	in	L	p	0	cld	0	NA	clm	Ejemplos elicitados	VV-FRE#089	A2	A2.take
Take	in	L	a	0	cld	0	NA	clm	Ejemplos elicitados	VV-JRV#011	A2	A2.take
Take	in	0	NA	0	cld	0	NA	clm	Ejemplos elicitados	VV-JRV#014	A2	A2.take
Take	in	0	NA	0	cld	0	NA	clm	Ejemplos elicitados	VV-JRV#054	A2	A2.take
Take	in	L	a	0	cld	0	NA	clm	Ejemplos elicitados	VV-JRV#055	A2	A2.take
Take	in	L	a	0	0	0	NA	V.P	Ejemplos elicitados	VV-JRV#056	A2	A2.take
Take	in	L	a	0	0	0	NA	V.P	Drama	WS-BIE#021	A2	A2.take
Take	in	0	NA	0	cld	0	NA	clm	Drama	WS-BIE#022	A2	A2.take
Take	an	0	NA	0	0	I1	s	V.P	Drama	WS-BIE#095	A2	A2.take
Give	in	L	a	0	0	0	NA	V.Dir	Narración	BL-FRE#007	A2	A2.give
Give	in	L	a	0	0	0	NA	V.Dir	Narración	BL-FRE#030	A2	A2.give
Give	in	L	p	0	0	0	NA	V.Dir	Narración	BL-FRE#086	A2	A2.give
Give	in	0	NA	0	0	0	NA	V.Dir	Narración	BL-FRE#088	A2	A2.give
Give	in	L	p	0	0	0	NA	V.Dir	Narración	BL-FRE#116	A2	A2.give
Give	in	L	p	0	0	0	NA	V.Dir	Entrevista	ET-MJC#121	A2	A2.give
Give	in	0	NA	0	cld	0	NA	clm	Entrevista	ET-MLA#185	A2	A2.give
Give	in	L	a	0	0	0	NA	V.Dir	Entrevista	ET-NXG#167	A2	A2.give
Give	in	L	a	0	0	0	NA	V.Dir	Narración	PS-AFS#037	A2	A2.give
Give	in	0	NA	0	cld	0	NA	clm	Narración	PS-FRE#111	A2	A2.give
Give	in	0	NA	0	cld	0	NA	clm	Narración	PS-FRE#114	A2	A2.give
Give	in	0	NA	0	cld	0	NA	clm	Narración	PS-FRE#119	A2	A2.give
Give	in	0	NA	0	cld	0	NA	clm	Narración	PS-JRV#103	A2	A2.give
Give	in	L	a	0	cld	0	NA	clm	Narración	PS-JRV#104	A2	A2.give
Give	in	0	NA	0	cld	0	NA	clm	Narración	PS-MJC#116	A2	A2.give
Give	in	0	NA	0	cld	0	NA	clm	Ejemplos elicitados	VV-ARS#006	A2	A2.give
Give	in	0	NA	0	cld	0	NA	clm	Ejemplos elicitados	VV-ARS#049	A2	A2.give
Give	in	L	p	0	0	0	NA	V.Dir	Ejemplos elicitados	VV-ARS#053	A2	A2.give
Give	in	L	a	0	cld	0	NA	clm	Ejemplos elicitados	VV-ARS#095	A2	A2.give
Give	in	L	p	0	cld	0	NA	clm	Ejemplos elicitados	VV-ARS#097	A2	A2.give
Give	in	L	a	0	0	0	NA	V.Dir	Ejemplos elicitados	VV-FRE#043	A2	A2.give
Give	in	L	a	0	cld	0	NA	clm	Ejemplos elicitados	VV-FRE#049	A2	A2.give
Give	in	L	p	0	0	0	NA	V.Dir	Ejemplos elicitados	VV-FRE#053	A2	A2.give
Give	in	L	a	0	0	0	NA	V.Dir	Ejemplos elicitados	VV-FRE#095	A2	A2.give
Give	in	L	a	0	0	0	NA	V.Dir	Ejemplos elicitados	VV-JRV#046	A2	A2.give
Give	in	L	a	0	0	0	NA	V.Dir	Ejemplos elicitados	VV-JRV#054	A2	A2.give
Give	in	0	NA	0	0	0	NA	V.Dir	Ejemplos elicitados	VV-JRV#055	A2	A2.give
Give	in	L	a	0	0	0	NA	V.Dir	Ejemplos elicitados	VV-JRV#101	A2	A2.give
Give	in	L	s	0	0	0	NA	V.Dir	Ejemplos elicitados	VV-JRV#102	A2	A2.give
Say	p	X	NA	0	0	0	NA	V.P	Narración	BL-FRE#063	A2	A2.say
Say	p	X	NA	0	0	0	NA	V.P	Otros	DC-ANV#011	A2	A2.say
Say	p	X	NA	0	0	0	NA	V.P	Otros	DC-JMR#002	A2	A2.say
Say	p	X	NA	0	0	0	NA	V.P	Otros	DC-JMR#005	A2	A2.say
Say	p	X	NA	0	0	0	NA	V.P	Otros	DC-JMR#007	A2	A2.say
Say	p	X	NA	0	0	0	NA	V.P	Otros	DC-JMR#009	A2	A2.say
Say	p	X	NA	0	0	0	NA	V.P	Otros	DC-JMR#013	A2	A2.say
Say	p	X	NA	0	0	0	NA	V.Dir	Entrevista	ET-MJC#014	A2	A2.say
Say	p	X	NA	0	0	0	NA	V.P	Entrevista	ET-MJC#048	A2	A2.say
Say	p	X	NA	0	0	0	NA	V.Dir	Entrevista	ET-MLA#062	A2	A2.say
Say	p	X	NA	0	0	0	NA	V.P	Entrevista	ET-MLA#063	A2	A2.say
Say	p	X	NA	0	0	0	NA	V.P	Entrevista	ET-MLA#068	A2	A2.say
Say	p	X	NA	0	0	0	NA	V.P	Entrevista	ET-MLA#072	A2	A2.say
Say	p	X	NA	0	0	0	NA	V.P	Entrevista	ET-MLA#210	A2	A2.say
Say	p	X	NA	0	0	0	NA	V.P	Entrevista	ET-NXG#041	A2	A2.say
Say	p	X	NA	0	0	0	NA	V.Dir	Entrevista	ET-NXG#063	A2	A2.say
Say	p	X	NA	0	0	0	NA	V.P	Entrevista	ET-NXG#082	A2	A2.say
Say	p	X	NA	0	0	0	NA	V.P	Entrevista	ET-NXG#206	A2	A2.say
Say	p	X	NA	0	0	0	NA	V.P	Narración	HC-JMR#011	A2	A2.say
Say	p	X	NA	0	0	0	NA	V.Dir	Narración	HC-JMR#017	A2	A2.say
Say	p	X	NA	0	0	0	NA	V.Dir	Ejemplos elicitados	VV-ARS#026	A2	A2.say
Say	p	X	NA	0	0	0	NA	V.Dir	Ejemplos elicitados	VV-ARS#047	A2	A2.say
Say	p	L	p	0	0	0	NA	V.Dir	Ejemplos elicitados	VV-FRE#026	A2	A2.say
Say	p	L	p	0	0	0	NA	V.Dir	Ejemplos elicitados	VV-FRE#047	A2	A2.say
Say	p	X	NA	0	0	0	NA	V.Dir	Ejemplos elicitados	VV-JRV#029	A2	A2.say
Say	p	X	NA	0	0	0	NA	V.Dir	Ejemplos elicitados	VV-JRV#050	A2	A2.say
Say	p	X	NA	0	0	0	NA	V.Dir	Ejemplos elicitados	VV-JRV#051	A2	A2.say
Say	p	X	NA	0	0	0	NA	V.P	Drama	WS-BIE#053	A2	A2.say
Explain	p	X	NA	0	0	0	NA	V.Dir	Narración	BL-FRE#079	A2	A2.explain
Explain	p	X	NA	0	0	0	NA	V.Dir	Narración	BL-FRE#119	A2	A2.explain
Explain	p	X	NA	0	0	0	NA	V.Dir	Narración	BL-FRE#162	A2	A2.explain
Explain	in	L	a	0	0	0	NA	V.Dir	Entrevista	ET-JAG#056	A2	A2.explain
Explain	in	L	a	0	0	0	NA	V.Dir	Entrevista	ET-JAG#057	A2	A2.explain
Explain	p	X	NA	0	0	0	NA	V.Dir	Entrevista	ET-MJC#131	A2	A2.explain
Explain	p	0	NA	0	0	0	NA	V.Dir	Entrevista	ET-MLA#073	A2	A2.explain
Explain	p	L	a	0	0	0	NA	V.Dir	Entrevista	ET-NXG#090	A2	A2.explain
Explain	p	L	p	0	0	0	NA	V.Dir	Entrevista	ET-NXG#124	A2	A2.explain
Explain	p	0	NA	0	0	0	NA	V.Dir	Entrevista	ET-NXG#125	A2	A2.explain
Explain	p	0	NA	0	0	0	NA	V.Dir	Narración	HC-JRV#002	A2	A2.explain
Explain	p	0	NA	0	0	0	NA	V.Dir	Narración	HC-JRV#010	A2	A2.explain
Explain	p	0	NA	0	0	0	NA	V.Dir	Narración	HC-JRV#014	A2	A2.explain
Explain	p	0	NA	0	0	0	NA	V.Dir	Narración	VS-CBB#035	A2	A2.explain
Explain	p	L	a	0	0	0	NA	V.Dir	Drama	WS-BIE#019	A2	A2.explain
Go	in	L	p	0	0	I2	n	V.L	Narración	BL-FRE#077	A2	A2.go
Go	in	L	p	0	0	I2	n	V.L	Narración	BL-FRE#111	A2	A2.go
Go	in	L	p	0	0	I2	n	V.L	Narración	BL-FRE#113	A2	A2.go
Go	in	L	a	0	0	I2	n	V.L	Otros	DC-JMR#004	A2	A2.go
Go	in	0	NA	0	0	I2	n	V.L	Entrevista	ET-JAG#072	A2	A2.go
Go	in	L	p	0	0	I2	n	V.L	Entrevista	ET-JAG#079	A2	A2.go
Go	in	L	p	0	0	I2	n	V.L	Entrevista	ET-MJC#184	A2	A2.go
Go	an	L	p	0	0	I2	n	V.L	Entrevista	ET-NXG#113	A2	A2.go
Go	in	0	NA	0	0	I2	n	V.L	Entrevista	ET-NXG#170	A2	A2.go
Go	in	L	p	0	0	I2	n	V.L	Narración	HC-JRV#076	A2	A2.go
Go	in	L	a	0	0	0	NA	V.L	Narración	PS-AFS#039	A2	A2.go
Go	in	0	NA	0	0	I2	n	V.L	Narración	VS-CBB#021	A2	A2.go
Go	in	0	NA	0	0	I2	n	V.L	Narración	VS-CBB#022	A2	A2.go
Go	in	L	p	0	0	I2	n	V.L	Narración	VS-CBB#039	A2	A2.go
Go	in	L	p	0	0	I2	n	V.L	Narración	VS-CBB#045	A2	A2.go
Go	in	L	p	0	0	0	NA	V.L	Ejemplos elicitados	VV-ARS#037	A2	A2.go
Go	in	L	p	0	0	I2	n	V.L	Ejemplos elicitados	VV-FRE#037	A2	A2.go
Go	in	L	p	0	0	0	NA	V.L	Ejemplos elicitados	VV-JRV#040	A2	A2.go
Go	an	L	p	0	0	I2	n	V.L	Drama	WS-BIE#144	A2	A2.go
Carry	an	0	NA	0	0	0	NA	V.L	Entrevista	ET-JAG#054	A2	A2.carry
Carry	an	0	NA	0	0	0	NA	V.L	Entrevista	ET-MJC#095	A2	A2.carry
Carry	an	0	NA	0	0	0	NA	V.L	Entrevista	ET-MJC#171	A2	A2.carry
Carry	an	0	NA	0	0	0	NA	V.L	Entrevista	ET-MJC#173	A2	A2.carry
Carry	an	0	NA	0	0	0	NA	V.L	Entrevista	ET-MJC#179	A2	A2.carry
Carry	an	0	NA	0	0	0	NA	V.L	Entrevista	ET-MLA#142	A2	A2.carry
Carry	an	0	NA	0	cld	0	NA	clm	Narración	HR-FRE#122	A2	A2.carry
Carry	an	0	NA	0	cld	0	NA	clm	Narración	HR-FRE#123	A2	A2.carry
Carry	in	L	p	0	cld	0	NA	clm	Narración	PS-JRV#122	A2	A2.carry
Carry	in	0	NA	0	cld	0	NA	clm	Ejemplos elicitados	VV-ARS#056	A2	A2.carry
Carry	in	L	a	0	0	0	NA	V.L	Ejemplos elicitados	VV-FRE#056	A2	A2.carry
Carry	in	L	s	0	0	0	NA	V.L	Ejemplos elicitados	VV-FRE#069	A2	A2.carry
Carry	in	L	a	0	0	0	NA	clm	Ejemplos elicitados	VV-JRV#062	A2	A2.carry
Look	an	L	p	0	0	0	NA	V.Dir	Narración	BL-FRE#019	A2	A2.look
Look	an	0	NA	0	0	I2	n	V.Dir	Narración	BL-FRE#022	A2	A2.look
Look	an	0	NA	0	0	I2	n	V.Dir	Narración	BL-FRE#106	A2	A2.look
Look	in	0	NA	0	0	I2	n	V.Dir	Narración	BL-FRE#160	A2	A2.look
Look	in	0	NA	0	0	I2	n	V.Dir	Narración	BL-FRE#170	A2	A2.look
Look	an	L	p	0	0	0	NA	V.Dir	Entrevista	ET-MJC#085	A2	A2.look
Look	an	0	NA	0	0	0	NA	V.Dir	Entrevista	ET-MJC#105	A2	A2.look
Look	in	0	NA	0	0	I2	n	V.Dir	Entrevista	ET-MJC#114	A2	A2.look
Look	in	0	NA	0	0	I2	n	V.Dir	Entrevista	ET-MJC#116	A2	A2.look
Look	in	0	NA	0	0	I2	n	V.Dir	Entrevista	ET-MJC#117	A2	A2.look
Look	p	0	NA	0	0	0	NA	V.Dir	Entrevista	ET-MLA#022	A2	A2.look
Look	in	L	p	0	0	0	NA	V.Dir	Entrevista	ET-MLA#029	A2	A2.look
Look	an	0	NA	0	0	I2	s	V.Dir	Entrevista	ET-NXG#035	A2	A2.look
Look	an	0	NA	0	0	I2	s	V.Dir	Entrevista	ET-NXG#036	A2	A2.look
Look	in	X	NA	0	0	0	NA	V.Dir	Entrevista	ET-NXG#204	A2	A2.look
Look	in	0	NA	0	0	I2	n	V.Dir	Entrevista	ET-NXG#215	A2	A2.look
Look	p	X	NA	0	0	0	NA	V.Dir	Entrevista	ET-NXG#255	A2	A2.look
Look	an	0	NA	0	0	I2	n	V.Dir	Entrevista	ET-NXG#258	A2	A2.look
Look	an	0	NA	0	0	I2	n	V.Dir	Narración	HC-JRV#042	A2	A2.look
Look	an	0	NA	0	0	I1/i2	n	V.Dir	Narración	HC-JRV#097	A2	A2.look
Look	an	0	NA	0	0	I2	n	V.Dir	Narración	HC-JRV#098	A2	A2.look
Look	an	0	NA	0	0	I2	n	V.Dir	Narración	HC-JRV#154	A2	A2.look
Look	in	0	NA	0	0	0	NA	V.Dir	Narración	HC-JRV#156	A2	A2.look
Look	in	0	NA	0	0	I2	n	V.Dir	Narración	HC-JRV#187	A2	A2.look
Look	in	0	NA	0	0	I2	n	V.Dir	Narración	HC-JRV#188	A2	A2.look
Look	in	0	NA	0	0	I2	n	V.Dir	Narración	HR-AFS#016	A2	A2.look
Look	in	0	NA	0	cld	0	NA	V.Dir	Narración	HR-ARS#002	A2	A2.look
Look	in	0	NA	0	0	I2	n	V.Dir	Narración	HR-ARS#008	A2	A2.look
Look	in	0	NA	0	0	0	NA	V.Dir	Narración	HR-ARS#020	A2	A2.look
Look	in	X	NA	0	0	0	NA	V.Dir	Narración	HR-ARS#028	A2	A2.look
Look	in	0	NA	0	0	I2	n	V.Dir	Narración	HR-ARS#032	A2	A2.look
Look	in	0	NA	0	0	I2	n	V.Dir	Narración	HR-ARS#041	A2	A2.look
Look	an	0	NA	0	0	I2	n	V.Dir	Narración	HR-ARS#043	A2	A2.look
Look	in	0	NA	0	0	0	NA	V.Dir	Narración	HR-ARS#056	A2	A2.look
Look	in	0	NA	0	0	I2	n	V.Dir	Narración	HR-ARS#070	A2	A2.look
Look	in	0	NA	0	0	I2	n	V.Dir	Narración	HR-ARS#076	A2	A2.look
Look	an	0	NA	0	0	I2	n	V.Dir	Narración	HR-ARS#082	A2	A2.look
Look	an	0	NA	0	0	I2	n	V.Dir	Narración	HR-CBB#004	A2	A2.look
Look	an	0	NA	0	0	I2	n	V.Dir	Narración	HR-FRE#005	A2	A2.look
Look	in	0	NA	0	0	I2	n	V.Dir	Narración	HR-FRE#018	A2	A2.look
Look	in	0	NA	0	0	I2	n	V.Dir	Narración	HR-FRE#026	A2	A2.look
Look	in	0	NA	0	0	0	NA	V.Dir	Narración	HR-FRE#037	A2	A2.look
Look	in	0	NA	0	0	0	NA	V.Dir	Narración	HR-FRE#044	A2	A2.look
Look	in	L	p	0	0	I2	n	V.Dir	Narración	HR-FRE#050	A2	A2.look
Look	in	0	NA	0	cli	I2	n	V.Dir	Narración	HR-FRE#053	A2	A2.look
Look	an	L	p	0	0	I2	n	V.Dir	Narración	HR-FRE#063	A2	A2.look
Look	in	0	NA	0	0	I2	n	V.Dir	Narración	HR-FRE#079	A2	A2.look
Look	an	0	NA	R	0	I2	s	V.Dir	Narración	HR-FRE#081	A2	A2.look
Look	in	0	NA	R	0	I2	s	V.Dir	Narración	HR-FRE#082	A2	A2.look
Look	in	L	p	0	0	I2	n	V.Dir	Narración	HR-FRE#096	A2	A2.look
Look	in	0	NA	0	0	I2	n	V.Dir	Narración	HR-FRE#097	A2	A2.look
Look	an	0	NA	0	0	I1/i2	n	V.Dir	Narración	HR-FRE#099	A2	A2.look
Look	an	0	NA	0	0	I2	n	V.Dir	Narración	HR-FRE#100	A2	A2.look
Look	an	0	NA	0	0	I1/i2	n	V.Dir	Narración	HR-FRE#101	A2	A2.look
Look	an	0	NA	0	0	I2	n	V.Dir	Narración	HR-FRE#110	A2	A2.look
Look	an	L	p	0	0	0	NA	V.Dir	Narración	HR-FRE#111	A2	A2.look
Look	in	0	NA	0	0	I2	n	V.Dir	Narración	HR-FRE#115	A2	A2.look
Look	an	L	p	0	0	I2	n	V.Dir	Narración	HR-MJC#007	A2	A2.look
Look	an	0	NA	0	0	I2	n	V.Dir	Narración	HR-MJC#009	A2	A2.look
Look	an	0	NA	0	0	I2	n	V.Dir	Narración	HR-MJC#020	A2	A2.look
Look	in	0	NA	0	0	I2	n	V.Dir	Narración	HR-MJC#077	A2	A2.look
Look	in	L	p	0	0	I2	n	V.Dir	Narración	HR-MJC#084	A2	A2.look
Look	in	L	p	0	0	I2	n	V.Dir	Narración	HR-MJC#093	A2	A2.look
Look	in	0	NA	0	0	I2	n	V.Dir	Narración	HR-MJC#094	A2	A2.look
Look	in	L	a	0	0	0	NA	V.Dir	Narración	HR-MJC#106	A2	A2.look
Look	in	L	p	0	0	0	NA	V.Dir	Narración	HR-MJC#111	A2	A2.look
Look	in	0	NA	0	0	I2	n	V.Dir	Narración	HR-MJC#144	A2	A2.look
Look	an	0	NA	0	0	I2	n	V.Dir	Narración	HR-MJC#151	A2	A2.look
Look	an	0	NA	0	0	I2	n	V.Dir	Narración	HR-MJC#153	A2	A2.look
Look	in	0	NA	0	0	I2	n	V.Dir	Narración	PS-FRE#043	A2	A2.look
Look	in	0	NA	0	0	I2	n	V.Dir	Narración	PS-FRE#045	A2	A2.look
Look	in	0	NA	0	cli	I2	n	V.Dir	Narración	PS-FRE#046	A2	A2.look
Look	an	0	NA	0	0	I2	n	V.Dir	Narración	PS-FRE#047	A2	A2.look
Look	in	0	NA	0	cli	I2	n	V.Dir	Narración	PS-FRE#049	A2	A2.look
Look	in	0	NA	0	cli	I2	n	V.Dir	Narración	PS-FRE#050	A2	A2.look
Look	in	0	NA	0	0	I1/i2	n	V.Dir	Narración	PS-FRE#068	A2	A2.look
Look	p	X	NA	0	0	0	NA	V.Dir	Narración	PS-FRE#085	A2	A2.look
Look	in	L	p	0	0	0	NA	V.Dir	Narración	PS-FRE#107	A2	A2.look
Look	p	0	NA	0	0	I2	n	V.Dir	Narración	PS-JRV#023	A2	A2.look
Look	in	L	s	0	0	0	NA	V.Dir	Narración	PS-JRV#029	A2	A2.look
Look	an	0	NA	0	0	I2	n	V.Dir	Narración	PS-JRV#033	A2	A2.look
Look	an	0	NA	0	0	I2	n	V.Dir	Narración	PS-JRV#036	A2	A2.look
Look	an	0	NA	0	0	I2	n	V.Dir	Narración	PS-JRV#061	A2	A2.look
Look	an	L	p	0	0	0	NA	V.Dir	Narración	PS-JRV#071	A2	A2.look
Look	in	L	p	0	0	0	NA	V.Dir	Narración	PS-JRV#073	A2	A2.look
Look	an	0	NA	0	0	I2	n	V.Dir	Narración	PS-JRV#075	A2	A2.look
Look	an	0	NA	0	0	I2	n	V.Dir	Narración	PS-JRV#095	A2	A2.look
Look	p	X	NA	0	0	0	NA	V.Dir	Narración	PS-JRV#115	A2	A2.look
Look	in	0	NA	0	0	I2	n	V.Dir	Narración	PS-JRV#117	A2	A2.look
Look	an	0	NA	0	0	I2	n	V.Dir	Narración	PS-JRV#121	A2	A2.look
Look	an	L	p	0	0	0	NA	V.Dir	Narración	PS-MJC#023	A2	A2.look
Look	in	0	NA	0	0	I2	n	V.Dir	Narración	PS-MJC#045	A2	A2.look
Look	in	0	NA	0	0	I2	n	V.Dir	Narración	PS-MJC#046	A2	A2.look
Look	an	0	NA	0	0	I2	n	V.Dir	Narración	PS-MJC#049	A2	A2.look
Look	an	0	NA	0	0	I2	n	V.Dir	Narración	PS-MJC#051	A2	A2.look
Look	an	0	NA	0	0	I2	n	V.Dir	Narración	PS-MJC#052	A2	A2.look
Look	an	0	NA	0	0	I2	n	V.Dir	Narración	PS-MJC#091	A2	A2.look
Look	in	0	NA	0	0	I2	n	V.Dir	Narración	PS-MJC#096	A2	A2.look
Look	in	L	p	0	0	I2	n	V.Dir	Narración	PS-MJC#110	A2	A2.look
Look	an	L	p	0	0	I2	n	V.Dir	Narración	PS-MJC#111	A2	A2.look
Look	an	0	NA	0	0	I2	n	V.Dir	Narración	PS-MJC#135	A2	A2.look
Look	an	L	p	0	0	I2	n	V.Dir	Ejemplos elicitados	VV-ARS#031	A2	A2.look
Look	an	L	p	0	0	I2	n	V.Dir	Ejemplos elicitados	VV-ARS#032	A2	A2.look
Look	an	L	p	0	0	I2	n	V.Dir	Ejemplos elicitados	VV-ARS#041	A2	A2.look
Look	an	0	NA	0	0	I2	n	V.Dir	Ejemplos elicitados	VV-ARS#042	A2	A2.look
Look	an	L	p	0	0	I2	n	V.Dir	Ejemplos elicitados	VV-ARS#094	A2	A2.look
Look	an	L	p	0	0	I2	n	V.Dir	Ejemplos elicitados	VV-FRE#031	A2	A2.look
Look	an	L	p	0	0	I2	n	V.Dir	Ejemplos elicitados	VV-FRE#032	A2	A2.look
Look	an	0	NA	0	0	I2	n	V.Dir	Ejemplos elicitados	VV-FRE#034	A2	A2.look
Look	an	0	NA	0	cli	I2	n	V.Dir	Ejemplos elicitados	VV-FRE#041	A2	A2.look
Look	an	L	p	0	0	I2	n	V.Dir	Ejemplos elicitados	VV-FRE#094	A2	A2.look
Look	p	L	p	0	0	I2	n	V.Dir	Ejemplos elicitados	VV-JRV#001	A2	A2.look
Look	an	L	p	0	0	I2	n	V.Dir	Ejemplos elicitados	VV-JRV#034	A2	A2.look
Look	an	L	p	0	0	I2	n	V.Dir	Ejemplos elicitados	VV-JRV#035	A2	A2.look
Look	an	L	p	0	0	I2	n	V.Dir	Ejemplos elicitados	VV-JRV#044	A2	A2.look
Look	an	0	NA	0	0	I2	n	V.Dir	Ejemplos elicitados	VV-JRV#099	A2	A2.look
Look	an	L	p	0	0	0	NA	V.Dir	Ejemplos elicitados	VV-JRV#100	A2	A2.look
Think	in	L	a	0	0	0	NA	V.P	Narración	BL-FRE#110	A2	A2.think
Think	p	X	NA	0	0	0	NA	V.P	Entrevista	ET-MLA#132	A2	A2.think
Think	p	X	NA	0	0	0	NA	V.P	Entrevista	ET-NXG#022	A2	A2.think
Think	p	X	NA	0	0	0	NA	V.P	Entrevista	ET-NXG#032	A2	A2.think
Think	p	X	NA	0	0	0	NA	V.P	Entrevista	ET-NXG#176	A2	A2.think
Think	p	X	NA	0	0	0	NA	V.P	Entrevista	ET-NXG#185	A2	A2.think
Think	an	L	p	0	0	0	NA	V.P	Ejemplos elicitados	VV-FRE#051	A2	A2.think
Think	in	L	p	0	0	0	NA	V.P	Ejemplos elicitados	VV-FRE#053	A2	A2.think
Think	an	L	p	0	0	0	NA	V.P	Ejemplos elicitados	VV-FRE#100	A2	A2.think
Think	an	L	a	0	0	0	NA	V.P	Ejemplos elicitados	VV-JRV#057	A2	A2.think
Think	p	X	NA	0	0	0	NA	V.P	Drama	WS-BIE#036	A2	A2.think
Think	p	X	NA	0	0	0	NA	V.P	Drama	WS-BIE#043	A2	A2.think
Throw	in	L	p	0	0	I2	n	V.L	Narración	BL-FRE#120	A3	A3.throw
Throw	in	0	NA	0	0	I2	n	V.L	Narración	BL-FRE#121	A3	A3.throw
Throw	in	0	NA	0	0	I2	n	V.L	Narración	BL-FRE#132	A3	A3.throw
Throw	in	L	a	0	cli	I2	n	clm	Narración	PS-AFS#008	A3	A3.throw
Throw	in	0	NA	0	cli	I2	n	clm	Narración	PS-AFS#009	A3	A3.throw
Throw	in	0	NA	0	0	I2	n	V.L	Narración	PS-AFS#034	A3	A3.throw
Throw	in	0	NA	0	0	I2	n	V.L	Narración	PS-MJC#008	A3	A3.throw
Throw	in	L	a	0	cli	I2	n	V.L	Narración	PS-MJC#031	A3	A3.throw
Throw	in	L	s	0	0	I2	n	V.L	Narración	PS-MJC#103	A3	A3.throw
Throw	in	L	a	0	0	I2	n	V.L	Ejemplos elicitados	VV-ARS#046	A3	A3.throw
Throw	in	L	a	0	0	I2	n	V.L	Ejemplos elicitados	VV-ARS#090	A3	A3.throw
Throw	in	L	a	0	0	I2	n	V.L	Ejemplos elicitados	VV-FRE#046	A3	A3.throw
Throw	in	L	s	0	0	I2	n	V.L	Ejemplos elicitados	VV-FRE#090	A3	A3.throw
Throw	in	L	a	0	0	I2	n	V.L	Ejemplos elicitados	VV-JRV#049	A3	A3.throw
Throw	in	L	p	0	0	I2	n	V.L	Ejemplos elicitados	VV-JRV#096	A3	A3.throw
Search	in	L	a	0	0	0	NA	V.P	Narración	HR-ARS#039	A3	A3.search
Search	in	0	NA	0	0	I2	n	V.P	Narración	HR-FRE#021	A3	A3.search
Search	in	0	NA	0	0	I2	n	V.P	Narración	HR-FRE#022	A3	A3.search
Search	in	0	NA	0	0	I2	n	V.P	Narración	HR-FRE#023	A3	A3.search
Search	in	0	NA	0	0	I2	n	V.P	Narración	HR-FRE#024	A3	A3.search
Search	in	X	NA	0	0	0	NA	V.P	Narración	HR-MJC#031	A3	A3.search
Search	in	X	NA	0	0	0	NA	V.P	Narración	HR-MJC#064	A3	A3.search
Take	in	0	NA	0	0	I2	n	clm	Narración	PS-FRE#004	A3	A3.take
Take	in	0	NA	0	0	I2	n	clm	Narración	PS-FRE#008	A3	A3.take
Take	in	0	NA	0	cli	0	NA	V.P	Narración	PS-FRE#048	A3	A3.take
Take	in	0	NA	0	0	I1	n	clm	Narración	PS-FRE#112	A3	A3.take
Take	in	0	NA	0	0	I2	n	clm	Narración	PS-FRE#114	A3	A3.take
Take	in	0	NA	0	cli	0	NA	clm	Narración	PS-JRV#007	A3	A3.take
Take	in	0	NA	0	cli	0	NA	clm	Narración	PS-JRV#009	A3	A3.take
Take	in	0	NA	0	cli	0	NA	clm	Narración	PS-JRV#011	A3	A3.take
Take	in	0	NA	0	cli	0	NA	clm	Narración	PS-JRV#013	A3	A3.take
Take	in	0	NA	0	cli	0	NA	clm	Narración	PS-JRV#025	A3	A3.take
Take	in	0	NA	0	cli	0	NA	clm	Narración	PS-JRV#027	A3	A3.take
Take	in	0	NA	0	cli	0	NA	clm	Narración	PS-JRV#044	A3	A3.take
Take	in	0	NA	0	cli	0	NA	clm	Narración	PS-MJC#039	A3	A3.take
Take	in	L	a	0	cli	0	NA	clm	Narración	PS-MJC#040	A3	A3.take
Take	in	0	NA	0	cli	0	NA	clm	Narración	PS-MJC#125	A3	A3.take
Take	in	L	p	0	0	I2	n	V.P	Narración	VS-CBB#012	A3	A3.take
Take	an	L	a	0	0	I1	n	V.P	Ejemplos elicitados	VV-ARS#050	A3	A3.take
Take	an	L	a	0	0	I1	n	V.P	Ejemplos elicitados	VV-FRE#050	A3	A3.take
Take	an	L	p	0	0	I1	n	clm	Ejemplos elicitados	VV-FRE#075	A3	A3.take
Give	an	0	NA	0	0	I2	n	V.Dir	Narración	BL-FRE#007	A3	A3.give
Give	an	0	NA	0	0	I2	n	V.Dir	Narración	BL-FRE#030	A3	A3.give
Give	an	0	NA	0	0	I2	n	V.Dir	Narración	BL-FRE#086	A3	A3.give
Give	an	0	NA	0	0	I2	n	V.Dir	Narración	BL-FRE#088	A3	A3.give
Give	an	0	NA	0	0	I2	n	V.Dir	Narración	BL-FRE#116	A3	A3.give
Give	an	0	NA	0	0	I2	s	V.Dir	Entrevista	ET-MJC#121	A3	A3.give
Give	an	0	NA	0	0	I2	n	clm	Entrevista	ET-MLA#185	A3	A3.give
Give	an	0	NA	0	0	I2	s	V.Dir	Entrevista	ET-NXG#064	A3	A3.give
Give	an	0	NA	0	0	I2	s	V.Dir	Entrevista	ET-NXG#167	A3	A3.give
Give	an	0	NA	0	0	I2	n	V.Dir	Narración	PS-AFS#037	A3	A3.give
Give	an	0	NA	0	0	I2	n	clm	Narración	PS-FRE#111	A3	A3.give
Give	an	0	NA	0	0	I2	n	clm	Narración	PS-FRE#114	A3	A3.give
Give	an	0	NA	0	0	I2	n	clm	Narración	PS-FRE#119	A3	A3.give
Give	an	0	NA	0	0	I2	n	clm	Narración	PS-JRV#103	A3	A3.give
Give	an	0	NA	0	0	I2	n	clm	Narración	PS-JRV#104	A3	A3.give
Give	an	0	NA	0	0	I2	n	clm	Narración	PS-MJC#116	A3	A3.give
Give	an	L	p	0	0	I2	n	clm	Ejemplos elicitados	VV-ARS#006	A3	A3.give
Give	an	L	a	0	0	I2	n	clm	Ejemplos elicitados	VV-ARS#049	A3	A3.give
Give	an	L	a	0	0	I2	n	V.Dir	Ejemplos elicitados	VV-ARS#053	A3	A3.give
Give	an	L	p	0	0	I2	n	clm	Ejemplos elicitados	VV-ARS#095	A3	A3.give
Give	an	L	a	0	0	I2	n	clm	Ejemplos elicitados	VV-ARS#097	A3	A3.give
Give	an	0	NA	0	0	I2	s	V.Dir	Ejemplos elicitados	VV-FRE#043	A3	A3.give
Give	an	L	p	0	0	I2	n	clm	Ejemplos elicitados	VV-FRE#049	A3	A3.give
Give	an	0	NA	0	0	I2	n	V.Dir	Ejemplos elicitados	VV-FRE#053	A3	A3.give
Give	an	L	p	0	0	I2	n	V.Dir	Ejemplos elicitados	VV-FRE#095	A3	A3.give
Give	an	0	NA	0	0	I2	s	V.Dir	Ejemplos elicitados	VV-JRV#046	A3	A3.give
Give	an	L	p	0	0	I2	n	V.Dir	Ejemplos elicitados	VV-JRV#054	A3	A3.give
Give	an	L	p	0	0	I2	n	V.Dir	Ejemplos elicitados	VV-JRV#055	A3	A3.give
Give	an	0	NA	0	0	I2	s	V.Dir	Ejemplos elicitados	VV-JRV#101	A3	A3.give
Give	an	L	s	0	0	I2	n	V.Dir	Ejemplos elicitados	VV-JRV#102	A3	A3.give
Say	an	0	NA	0	0	0	NA	V.P	Narración	BL-FRE#063	A3	A3.say
Say	an	0	NA	0	0	0	NA	V.P	Otros	DC-ANV#011	A3	A3.say
Say	an	0	NA	0	0	I2	n	V.Dir	Entrevista	ET-MJC#014	A3	A3.say
Say	an	0	NA	0	0	I2	s	V.Dir	Entrevista	ET-MLA#062	A3	A3.say
Say	an	0	NA	0	0	I2	s	V.Dir	Entrevista	ET-NXG#063	A3	A3.say
Say	an	0	NA	0	0	I2	n	V.Dir	Narración	HC-JMR#017	A3	A3.say
Say	an	0	NA	0	0	I2	s	V.Dir	Ejemplos elicitados	VV-ARS#026	A3	A3.say
Say	an	0	NA	0	0	I2	n	V.Dir	Ejemplos elicitados	VV-ARS#047	A3	A3.say
Say	an	0	NA	0	0	I2	s	V.Dir	Ejemplos elicitados	VV-FRE#026	A3	A3.say
Say	an	0	NA	0	0	I2	n	V.Dir	Ejemplos elicitados	VV-FRE#047	A3	A3.say
Say	an	0	NA	0	0	I2	s	V.Dir	Ejemplos elicitados	VV-JRV#029	A3	A3.say
Say	an	0	NA	0	0	I2	s	V.Dir	Ejemplos elicitados	VV-JRV#050	A3	A3.say
Say	an	0	NA	0	0	I2	n	V.Dir	Ejemplos elicitados	VV-JRV#051	A3	A3.say
Explain	an	0	NA	0	0	I2	n	V.Dir	Narración	BL-FRE#079	A3	A3.explain
Explain	an	0	NA	R	0	I2	s	V.Dir	Narración	BL-FRE#119	A3	A3.explain
Explain	an	0	NA	0	0	I2	n	V.Dir	Narración	BL-FRE#162	A3	A3.explain
Explain	an	0	NA	R	0	0	NA	V.Dir	Narración	BL-FRE#166	A3	A3.explain
Explain	an	0	NA	0	0	I2	s	V.Dir	Entrevista	ET-JAG#056	A3	A3.explain
Explain	an	0	NA	0	0	I2	s	V.Dir	Entrevista	ET-JAG#057	A3	A3.explain
Explain	an	0	NA	0	0	I2	s	V.Dir	Entrevista	ET-MJC#131	A3	A3.explain
Explain	an	0	NA	0	0	I2	s	V.Dir	Entrevista	ET-MLA#073	A3	A3.explain
Explain	an	0	NA	0	0	I2	s	V.Dir	Entrevista	ET-NXG#090	A3	A3.explain
Explain	an	0	NA	0	0	I2	s	V.Dir	Entrevista	ET-NXG#124	A3	A3.explain
Explain	an	0	NA	0	0	I2	n	V.Dir	Entrevista	ET-NXG#125	A3	A3.explain
Explain	an	0	NA	0	0	I2	n	V.Dir	Narración	HC-JRV#002	A3	A3.explain
Explain	an	0	NA	0	0	I2	n	V.Dir	Narración	HC-JRV#010	A3	A3.explain
Explain	an	0	NA	0	0	I2	n	V.Dir	Narración	HC-JRV#014	A3	A3.explain
Explain	an	L	p	0	0	I2	n	V.Dir	Ejemplos elicitados	VV-ARS#012	A3	A3.explain
Explain	an	L	p	0	0	I2	n	V.Dir	Ejemplos elicitados	VV-FRE#012	A3	A3.explain
Explain	an	L	p	0	0	I2	n	V.Dir	Ejemplos elicitados	VV-FRE#027	A3	A3.explain
Explain	an	0	NA	0	0	I2	n	V.Dir	Drama	WS-BIE#019	A3	A3.explain
Carry	in	L	p	0	0	I2	n	V.L	Entrevista	ET-JAG#054	A3	A3.carry
Carry	in	L	p	0	0	I2	n	V.L	Entrevista	ET-MJC#095	A3	A3.carry
Carry	in	L	p	0	0	I2	n	V.L	Entrevista	ET-MJC#171	A3	A3.carry
Carry	in	L	a	0	0	I2	n	V.L	Entrevista	ET-MJC#173	A3	A3.carry
Carry	in	L	p	0	0	I2	n	V.L	Entrevista	ET-MJC#179	A3	A3.carry
Carry	in	L	p	0	0	I2	n	V.L	Entrevista	ET-MLA#142	A3	A3.carry
Carry	in	X	NA	0	0	I2	n	clm	Ejemplos elicitados	VV-ARS#056	A3	A3.carry
Carry	in	L	a	0	0	I2	n	V.L	Ejemplos elicitados	VV-FRE#056	A3	A3.carry
Carry	in	L	a	0	0	I2	n	V.L	Ejemplos elicitados	VV-FRE#069	A3	A3.carry
Carry	in	L	a	0	0	0	NA	clm	Ejemplos elicitados	VV-JRV#062	A3	A3.carry
Look	in	0	NA	0	0	I2	n	V.Dir	Narración	BL-FRE#018	A3	A3.look
Look	in	0	NA	0	0	I2	n	V.Dir	Narración	BL-FRE#143	A3	A3.look
Look	in	0	NA	0	0	I2	n	V.Dir	Narración	BL-FRE#145	A3	A3.look
Look	in	0	NA	0	0	I2	n	V.Dir	Narración	BL-FRE#149	A3	A3.look
Look	in	0	NA	0	0	I2	n	V.Dir	Narración	BL-FRE#179	A3	A3.look
Look	in	0	NA	0	0	I2	n	V.Dir	Narración	BL-FRE#191	A3	A3.look
Look	in	0	NA	0	0	I2	n	V.Dir	Entrevista	ET-JAG#107	A3	A3.look
Look	in	0	NA	0	0	I2	n	V.Dir	Narración	HR-ARS#013	A3	A3.look
Look	in	0	NA	0	0	I2	n	V.Dir	Narración	HR-ARS#063	A3	A3.look
Look	in	0	NA	0	0	I2	n	V.Dir	Narración	HR-FRE#035	A3	A3.look
Look	in	0	NA	0	0	I2	n	V.Dir	Narración	HR-FRE#078	A3	A3.look
Look	in	0	NA	0	0	I2	n	V.Dir	Narración	HR-FRE#094	A3	A3.look
Look	in	X	NA	0	0	I2	n	V.Dir	Narración	HR-MJC#022	A3	A3.look
Look	in	0	NA	0	0	I2	n	V.Dir	Narración	HR-MJC#035	A3	A3.look
Look	in	L	a	0	0	I2	n	V.Dir	Narración	HR-MJC#043	A3	A3.look
Look	in	0	NA	0	0	I2	n	V.Dir	Narración	HR-MJC#051	A3	A3.look
Look	in	0	NA	0	0	I2	n	V.Dir	Narración	HR-MJC#069	A3	A3.look
Look	in	0	NA	0	0	I2	n	V.Dir	Narración	HR-MJC#072	A3	A3.look
Look	in	0	NA	0	0	I2	n	V.Dir	Narración	HR-MJC#089	A3	A3.look
Look	in	0	NA	0	0	I2	n	V.Dir	Narración	PS-JRV#031	A3	A3.look
Look	in	0	NA	0	0	I2	n	V.Dir	Narración	PS-JRV#100	A3	A3.look
Look	in	0	NA	0	0	I2	n	V.Dir	Narración	PS-MJC#131	A3	A3.look
